1 **Locating cellular contents during cryoFIB milling by cellular secondary-electron imaging**

2 Chao Lin<sup>1,2,3,4,5\*</sup>, Li Zhang<sup>1,2,3,4,5\*</sup>, Ziyang Zhang<sup>1,2,3,4,5\*</sup>, Yifeng Jiang<sup>6\*</sup>, Xueming Li<sup>1,2,3,4,5†</sup>

3

4 **Author Information**

5 \* These authors contributed equally to this work: Chao Lin, Li Zhang, Ziyang Zhang, and Yifeng  
6 Jiang

7 † Correspondence should be addressed to: Xueming Li (lixueming@tsinghua.edu.cn),

8

9 **Affiliation**

10 1. Key Laboratory for Protein Sciences of Ministry of Education, School of Life Sciences,  
11 Tsinghua University, Beijing 100084, China

12 2. School of Life Sciences, Tsinghua University, Beijing 100084, China

13 3. Tsinghua-Peking Joint Center for Life Sciences, Beijing 100084, China

14 4. Beijing Frontier Research Center for Biological Structure, Beijing 100084, China

15 5. Advanced Innovation Center for Structural Biology, Beijing 100084, China

16 6. ZEISS Microscopy Customer Center, Beijing laboratory, Beijing 100088, China

17

18 **Abstract**

19 Cryo-electron tomography (cryoET) is a powerful technique that enables the direct study of the  
20 molecular structure of tissues and cells. Cryo-focused ion beam (cryoFIB) milling plays an  
21 important role in preparation of high-quality thin lamellar samples for cryoET studies, promoting  
22 the rapid development of cryoET in recent years. However, locating the regions of interest in a  
23 large cell or tissue during cryoFIB milling remains a major challenge limiting cryoET  
24 applications on arbitrary biological samples. Here, we report an on-the-fly location method based  
25 on cellular secondary electron imaging (CSEI). CSEI is derived from a basic imaging function of  
26 the cryoFIB instruments and enables high-contrast imaging of the cellular contents of frozen  
27 hydrated biological samples, highlighted by that both fluorescent labels and additional devices  
28 are not required. The present work discusses the imaging principles and settings for optimizing  
29 CSEI. Tests on several commercially available cryoFIB instruments demonstrated that CSEI was  
30 feasible on mainstream instruments to observe all types of cellular contents and was reliable  
31 under different milling conditions. Assisted by CSEI, we established a simple milling-location  
32 workflow and tested it using the basal body of *Chlamydomonas reinhardtii*.

33

## 34 Introduction

35 Cryo-electron tomography (cryoET) is a popular technique that allows the observation of  
36 the *in situ* molecular structure of tissues and cells. However, owing to the weak penetration of  
37 electrons, cryoET works only on thin samples, typically 100–200 nm in thickness. Meanwhile,  
38 the view field of a single cryoET snapshot is usually smaller than 1  $\mu\text{m}$ , which is limited by the  
39 available number of pixels on the camera and the desired resolution. Therefore, the total volume  
40 of a cryoET tomogram is typically less than 0.1  $\mu\text{m}^3$ . The development of cryo-focused ion beam  
41 (cryoFIB) milling has largely solved the problem of preparing such a small and thin lamella,  
42 thereby promoting the rapid development of cryoET in recent years. However, locating such a  
43 tiny region inside frozen tissues or cells with a size of thousands of cubic micrometers is still  
44 challenging.

45 The currently available methods for locating the regions of interest in cryoET sample  
46 preparation are mainly based on fluorescence, known as cryo-correlated light and electron  
47 microscopy (cryoCLEM)<sup>1-4</sup>. CryoCLEM matches the images of fluorescence light microscopy  
48 and cryo-electron microscopy (cryoEM) and then locates the regions of interest in an electron  
49 microscope based on fluorescence light microscopy images. CryoCLEM can assist cryoFIB  
50 milling in two ways, i.e., by using separated optical instruments or by integrating optical  
51 microscopy attachments into a cryoFIB instrument. The former does not allow on-the-fly  
52 positioning during milling. The resolution of fluorescence imaging is much lower than that in  
53 conventional applications because of the long working distance of the optical objective lens,  
54 which is required for liquid nitrogen cooling and to avoid contamination. In the second method,  
55 on-the-fly positioning is possible using an integrated optical microscope, but the optical  
56 resolution is much lower than that of the first approach because of the similar working distance  
57 issue and limited space inside the cryoFIB instrument. While both confocal and super-resolution  
58 fluorescence microscopy have been used in cryoCLEM and have the potential to achieve three-  
59 dimensional (3D) localization, localization in the axial direction is still challenging, mostly  
60 limited by poor resolution<sup>5, 6</sup>. In addition to these problems, the complicated procedure of  
61 cryoCLEM operations and the lack of stable commercial devices are major limiting factors in  
62 practice. However, devitrification due to optical excitation<sup>5-7</sup> and the need for fluorescence labels  
63 are sometimes issues for some samples.

64 Therefore, finding an alternative method, especially enabling on-the-fly location during  
65 cryoFIB milling, is necessary and important. Secondary electron imaging may be an ideal  
66 candidate. CryoFIB instruments are usually designed based on scanning electron microscope that  
67 simultaneously supports scanning electron microscopy (SEM) imaging. The secondary electrons  
68 are the most basic signals used in SEM imaging and usually provide topographical imaging to  
69 assist in cryoFIB milling. Secondary electron excitation is insensitive to element composition  
70 and is seldom used for composition-related imaging. Some studies on cryoFIB-SEM block face  
71 imaging<sup>8-12</sup> reported secondary electron imaging of frozen hydrated biological samples, which  
72 showed high contrast of the cellular contents, including organelles and membranes, on flat  
73 surfaces prepared by cryoFIB milling. The contrast of secondary electron images is thought to be  
74 related to the water content and lipid composition, thus exhibiting the ultrastructure of the cells.  
75 The mechanism of contrast formation is complicated and related to the interactions between the  
76 primary electrons and the exposed biological sample after milling<sup>8</sup>. Because secondary electron  
77 imaging is the most fundamental function of a cryoFIB instrument, it would be an ideal solution  
78 for on-the-fly 3D location.

79 Herein, we report a method based on cellular secondary electron imaging (CSEI) for  
80 accurate on-the-fly 3D location of frozen hydrated biological samples during cryoFIB milling.  
81 This method does not require fluorescent markers, special sample processing, or additional  
82 devices. We established a complete workflow for CSEI-based location, compared and optimized  
83 the imaging quality of several commercially available cryoFIB instruments. Samples from  
84 different species, including bacteria, *Chlamydomonas*, mammalian cells, mammalian and plant  
85 tissues, were tested to demonstrate CSEI use in locating organelles, membraneless organelles,  
86 and protein aggregates. Finally, we demonstrate a complete 3D locating-milling workflow using  
87 the basal body of *C. reinhardtii* flagella.

88

## 89 **Results**

### 90 **Secondary electron imaging for frozen hydrated cellular samples**

91 SEM uses primary electron beam scanning across the sample surface to excite detectable signals,  
92 such as secondary and backscattered electrons, for imaging. The excited secondary electrons are  
93 the signals used in the present work and can be classified into at least three types<sup>13</sup>: those excited  
94 on the sample surface directly by the primary electron beam (termed SE<sub>I</sub>); those excited by the

95 backscattered electrons inside the sample (termed SE<sub>II</sub>); and those excited by the backscattered  
96 or primary electrons striking the chamber or polepiece (termed SE<sub>III</sub> and SE<sub>IV</sub>). SE<sub>I</sub> and SE<sub>II</sub> are  
97 generated from the sample and play a major role in imaging. Secondary electrons have low  
98 energy (typically less than 50 eV) and can only escape from the shallow surface (typically less  
99 than 10 nm) of the sample<sup>13</sup>. In topographical imaging applications during cryoFIB milling,  
100 secondary electron images are mostly optimized to display the shape of the sample after milling  
101 rather than to observe the cellular structures in the milled surface.

102 In several reports on cryoFIB-SEM block face imaging, cellular contrast by the secondary  
103 electron imaging has been observed on cryoFIB-milled surfaces. Cellular contrast originates  
104 from the escaping secondary electrons on the sample surface. The more electrons that escape, the  
105 brighter the corresponding area is. Many factors can influence electron escape or contrast  
106 formation, including but not limited to the follows<sup>8</sup>: (a) a negatively charged surface promotes  
107 secondary electron escape; conversely, a positively charged surface suppresses emission; (b) the  
108 electric state inside the biological sample, such as hydrophilic and hydrophobic interactions, also  
109 affects the efficiency of secondary electron production<sup>8</sup>; (c) the production efficiency of the  
110 secondary electrons is relatively sensitive to the element type for light atoms (atomic number less  
111 than 20); hence, the biological sample might exhibit some compositional contrast. Combining  
112 these properties of secondary electron escape, we refer to the related imaging formation as CSEI  
113 and use CSEI to observe and locate different cellular contents (**Fig. 1**). Regions with high water  
114 content, such as the interstitial spaces of intracellular materials, were shown in bright grayscale.  
115 Vesicles with relatively higher water content (**Fig. 1a**) showed higher brightness. In contrast,  
116 membrane structures (**Fig. 1b**), organelles with dense proteins (**Fig. 1c**), and protein condensates,  
117 such as starch sheaths (**Fig. 1d**) and chromatin aggregates (**Fig. 1e**), were displayed in black  
118 grayscale. These high-contrast features enabled the location of cellular contents.

119

## 120 **Hardware configurations for imaging frozen hydrated samples**

121 Secondary electron imaging is usually optimized for topographical imaging to assist cryoFIB  
122 milling (**Supplementary Fig. 1a-c**) and, hence, seldom shows cellular contrast with the default  
123 settings on some instruments (**Supplementary Fig. 1d**). The hardware configurations and  
124 imaging settings (discussed in the next section) should be considered to enable the location of the  
125 CSEI.

126 We tested several cryoFIB instruments for CSEI, including Helios (Thermo Fisher  
127 Scientific), Aquilos 1 and 2 (Thermo Fisher Scientific), and Crossbeam 550 (Carl Zeiss  
128 Microscopy GmbH). Multiple secondary electron detectors were installed at different locations  
129 inside these instruments and categorized into in-lens and in-chamber detectors (**Supplementary**  
130 **Table 1**). These detectors could only detect a portion of the secondary electrons that escaped in  
131 specific directions. The in-lens detectors were installed inside the lens or column and mainly  
132 detected electrons escaping at high angles (relative to the sample surface), mostly SE<sub>I</sub>. SE<sub>II</sub> had a  
133 wide range of escape directions and were mainly detected by an in-chamber detector. SE<sub>I</sub> were  
134 more sensitive to the surface electronic potential of the sample because the surface potential was  
135 perpendicular to the surface, that is, along the escape direction of the SE<sub>I</sub>. The resolution of SE<sub>II</sub>  
136 imaging was generally lower than that of SE<sub>I</sub> imaging because the backscattered electrons had a  
137 larger interaction area in the sample than the primary electrons. In summary, the images from the  
138 in-lens detectors often have better resolution than those from the in-chamber detectors but are  
139 more sensitive to surface charging<sup>13</sup>. However, the actual imaging efficacy is complicated. For  
140 example, the incident direction of the primary electrons is usually not perpendicular to the milled  
141 sample surface in all the tested cryoFIB instruments, which complicates the relationship between  
142 the detection and the escape angles of the secondary electrons. Moreover, the detection principle,  
143 detection position, and parameter settings of the detectors on different instruments can vary,  
144 leading to significant differences in the imaging results (**Fig. 2**, **Supplementary Fig. 2**, and  
145 **Supplementary Fig. 3**).

146 All cryoFIB instruments tested here have the capability of CSEI for frozen hydrated cellular  
147 samples. In the tests using *Escherichia coli* samples (**Fig. 2**), Crossbeam 550 showed the best  
148 resolution (**Fig. 2d, h**). As expected, the in-lens detectors (**Fig. 2a-d**) often have better resolution  
149 than the in-chamber detectors (**Fig. 2e-h**) but are more frequently influenced by shadows (**Fig.**  
150 **2a-d**) associated with surface charging. Some instruments support the simultaneous output of  
151 separated images from different detectors. We can either choose a single image or merge them to  
152 generate a more complete image to minimize the influence of shadows. For example, the shadow  
153 areas from the in-lens (**Supplementary Fig. 4a**) and in-chamber (**Supplementary Fig. 4b**)  
154 detectors of Crossbeam 550 are often complementary and can be dismissed by merging the  
155 images from the two detectors (**Supplementary Fig. 4c**).

156 In addition, different lens settings are often used for survey and high-resolution imaging  
157 mode (**Supplementary Table 2**). These settings include the lens mode, beam size, and the  
158 effective working distance of the lens. The survey mode usually aims to provide a fast and large  
159 view at a lower resolution than the high-resolution mode. In our test, the high-resolution mode  
160 presented clearer features of the outer membrane than did the survey mode (**Supplementary Fig.**  
161 **5**). However, the resolution loss of the survey mode seems modest; hence, it should still be  
162 sufficient for most location purposes. A shorter working distance has a positive influence on the  
163 imaging resolution of the in-lens detectors but is quite subtle (**Supplementary Fig. 6-7**). We also  
164 observed that the high-resolution mode was often severely affected by surface charging  
165 compared with the survey mode when using the in-lens detector on Helios (**Supplementary Fig.**  
166 **5c** and **Supplementary Fig. 6d, h, l**).

167

### 168 **Imaging settings for frozen hydrated samples**

169 In addition to hardware configurations, the imaging settings also play an important role in  
170 displaying cellular features. It is necessary to optimize these settings to obtain high-quality CSEI.

171 First, the acceleration voltage of the primary electron beam is a key factor (**Supplementary**  
172 **Fig. 8-10**). Reducing the incident electron energy can increase secondary electron emission<sup>13</sup>.  
173 However, a lower voltage reduces the penetration capability of primary electrons, leading to a  
174 decrease in the electron interaction depth of the sample<sup>13</sup>. Consequently, the secondary electron  
175 signal excited by the primary electrons with a lower voltage becomes more sensitive to the  
176 extreme surface state of the sample<sup>13</sup>. We tested an accelerating voltage of 1 kV, all images had  
177 poor contrast (**Supplementary Fig. 8a-d**, **Supplementary Fig. 9a-c**, and **Supplementary Fig.**  
178 **10a-b**), even showing carved features (**Supplementary Fig. 9a-c**). One explanation was that the  
179 secondary electron signal excited at such a low voltage was mainly from the shallow surface that  
180 was damaged by FIB radiation. When the voltage was increased to 2 or 3 kV, the interaction  
181 depth increased, allowing the signal of the undamaged biological structures under the damaged  
182 surface layer to be excited (**Supplementary Fig. 8e-l**, **Supplementary Fig. 9d-f**, and  
183 **Supplementary Fig. 10c-f**). Upon further increasing the voltage to 5 kV, the charging problem  
184 was obviously enhanced (**Supplementary Fig. 8m-p**, **Supplementary Fig. 9g-i**, and  
185 **Supplementary Fig. 10g-h**). This might indicate charging accumulation in the bulky sample  
186 because the number of electrons escaping from the sample became less than the number of input

187 primary electrons at a high accelerating voltage (corresponding to the upper crossover energy  $E_2$   
188 given by Joy and Joy<sup>14</sup>). In addition, the cellular contrast of some images taken at 1 kV was  
189 reversed relative to the images obtained at higher voltage (Supplementary Fig. 8a-d). This  
190 phenomenon might also be related to the balance between the amount of input and the escape of  
191 electrons<sup>13</sup>. In summary, an acceleration voltage of 2–3 kV was the choice for the CSEI.

192 Secondly, increasing the electron beam dwell time (Supplementary Fig. 11-12) and  
193 electron beam current (Supplementary Fig. 13), as well as increasing the number of repetitive  
194 scans (Supplementary Fig. 14), could improve the imaging contrast. This improvement should  
195 benefit from a better signal-to-noise ratio by increasing the radiation dose. More radiation causes  
196 greater radiation damage and charge accumulation inside the sample body. A longer dwell time  
197 and repetitive scans increase the imaging time, hence, make the image susceptible to the sample  
198 motion (Supplementary Fig. 11e, f and Supplementary Fig. 14i, j), ultimately, affecting the  
199 imaging resolution. We typically use an electron beam current of 50 pA, a dwell time of 1  $\mu$ s and  
200 repetitive scans of 20 times.

201

## 202 Secondary electron imaging and 3D locating during cryoFIB milling

203 On-the-fly 3D location can be enabled by frequently applying a CSEI during FIB milling. By  
204 imaging each milled surface, we were able to search for target objects based on cellular features.  
205 Initially, a large ion beam current, typically as high as 3 nA, was applied on a large area to  
206 achieve fast initial milling and searching, followed by precise milling with progressively reduced  
207 ion beam currents (Fig. 3a) to improve sample surface flatness and decrease radiation damage, as  
208 well as to further pinpoint the target location. Such a milling procedure requires CSEI on various  
209 surfaces generated by different ion beam currents.

210 A higher cryoFIB current may cause more surface radiation damage and hence influence the  
211 imaging quality. In addition, a high ion beam current often produces a rough surface and makes  
212 the milling sensitive to surface ice contamination, which is known as the ‘curtaining issue’<sup>15</sup>. We  
213 tested the CSEI with weak and strong curtaining issues under different ion beam currents. The  
214 variation of the ion beam currents and the presence of curtain did not influence the CSEI, as  
215 demonstrated by the precise cellular features of the bacteria (Fig. 3b-f and Supplementary Fig.  
216 15).

217 The resolution of the CSEI was at the nanometer level, which was sufficient to resolve most



218 membrane structures. Such resolution enables the visualization of tightly interacting membranes,  
219 such as the inner and outer membranes of *E. coli* (**Fig. 4a**), as well as the stacked thylakoids in  
220 the chloroplasts of *C. reinhardtii* (**Supplementary Fig. 16**).

221

## 222 **Secondary electron imaging of organelles in single cells and tissues**

223 To locate the intracellular organelles in the frozen state, we tested the CSEI using several  
224 different cell samples. In prokaryotic *E. coli*, the inner and outer membranes, vesicles, and  
225 cavities could be clearly distinguished, and the nucleoid had a brighter gray level than cytoplasm  
226 (**Fig. 4a**). In unicellular eukaryotic *C. reinhardtii* cells, characteristic features were observed,  
227 including a cup-shaped chloroplast occupying half of the cell, a pyrenoid located at the base of  
228 the chloroplast, and a nucleus surrounded by the chloroplast (**Fig. 4b**). Meanwhile, organelles  
229 such as Golgi bodies, Golgi vesicles, mitochondria, vesicles, vacuoles, contractile vacuoles,  
230 electron dense bodies, and starch grains could also be clearly identified (**Fig. 4b**). In mammalian  
231 human skin squamous carcinoma (A431 cells) (**Fig. 4c**) and HeLa (**Fig. 4d**) cells, the nucleus  
232 occupies a large volume of the cell, in which the double-layered nuclear membrane and even the  
233 nuclear pores could be clearly distinguished. Organelles such as mitochondria, lipid droplets,  
234 lipid bodies, multivesicular bodies, endoplasmic reticulum, and autophagic vacuoles could be  
235 clearly identified, and even ridges inside the mitochondria could be observed (**Fig. 4c, d**).

236 Bulk samples of plant and animal tissues were observed. The imaging quality of the tissue  
237 samples was not as good as that of the single-cell samples. The reason for this remained unclear.  
238 Nonetheless, various organelles were still clearly visible, including filaments in the mouse liver  
239 tissue (**Fig. 4e**). In *Raphanus sativus* plant tissues, membrane structures within the chloroplasts  
240 were clearly visible (**Fig. 4f**). In another observation for the same sample, some chloroplasts  
241 were slightly lighter than others, which might be related to the different contents of the  
242 chloroplast matrix proteins (**Supplementary Fig. 17**).

243 These tests demonstrate that the CSEI can be used to observe and locate organelles and their  
244 fine structures and hence is generally applicable to samples from different species.

245

## 246 **Secondary electron imaging of membraneless organelles and aggregates**

247 Studies on membraneless organelles and protein aggregates inside cells are popular in cell  
248 biology. CSEI provides a way to precisely locate these cellular contents. We first tested *C.*

249 *reinhardtii* cells and observed the phase separation droplet formed by Rubisco interacting with  
250 EPYC1<sup>16</sup>. The droplet was wrapped by a pyrenoid and was clearly distinguished from other  
251 regions of the cells (**Fig. 5a**). In another *C. reinhardtii* cell, we observed that the Rubisco droplet  
252 contained some texture features and did not fill the entire pyrenoid interior, which was related to  
253 the different developmental stages of the cells<sup>17</sup>(**Fig. 5b**). The nucleolus is a membraneless  
254 cellular compartment that is thought to be associated with phase transitions<sup>18</sup>. We observed  
255 distinctly different contrasts in the nucleolus of *C. reinhardtii* and HeLa from the surrounding  
256 nucleoplasm by CSEI (**Fig. 5c-d**). In addition to the nucleolus, chromatin in different  
257 aggregation states, including heterochromatin and euchromatin, were observed with different  
258 grayscales (**Fig. 5e**). In *E. coli* overexpressing the *Thermoplasma acidophilum* 20S (T20S)  
259 proteasome, protein aggregates frequently appeared in dark contrast (**Fig. 5f, g**). These results  
260 suggest that CSEI can be used to observe and localize membraneless organelles and protein  
261 aggregates.

262

### 263 **An example of locating and precisely milling the basal body of *C. reinhardtii***

264 The *C. reinhardtii* basal body is the organizing center of the flagellum<sup>19</sup> and has a diameter of  
265 approximately 250 nm<sup>20</sup>. Mature *C. reinhardtii* contain only one basal body pair. The low  
266 amount and small size compared with the ~10 µm cell size make it nearly impossible to prepare a  
267 thin lamella containing the basal body without on-the-fly locating. We demonstrated a cryoFIB  
268 milling procedure with CSEI using the basal body as the target.

269 Cultured *C. reinhardtii* cells were plunge-frozen and Pt-coated, following a general protocol  
270 (see Methods). The initial cryoFIB milling was performed in a window of 20 µm width and 7 µm  
271 height under the FIB view (**Supplementary Fig. 18a**), using a large 3 nA ion beam current. The  
272 first CSEI showed clear structures in several cells (**Fig. 6a**). The basal body is typically found on  
273 the *C. reinhardtii* head that is characterized by the adjacent nucleus and vesicles. Based on these  
274 features, we determined a targeting position (**Fig. 6a**) and performed millings with a depth step  
275 of ~0.6 µm and an ion beam current of 700 pA. After repeating this milling process twice (**Fig.**  
276 **6b-c**), we performed multiple milling processes with a smaller depth step of ~0.3 µm and a  
277 smaller ion beam current of 300 pA. After removal at a depth of more than 2.8 µm (relative to  
278 the surface of **Fig. 6a**), we observed the basal body (**Fig. 6d**). In such a milling-locating  
279 procedure, the choice of milling steps and ion beam currents are determined according to the

280 actual situations. A smaller step and a lower current should be used closer to the predicted  
281 targeting depth. After reaching the target, we milled the opposite side of the sample and reduced  
282 the lamellar width to 12  $\mu\text{m}$  to improve the milling efficiency (**Fig. 6e and Supplementary Fig.**  
283 **18**). After finishing the milling on both sides of the lamella, the lamella is usually polished by  
284 further milling to a 20 nm depth on two surfaces with a small ion beam current of 50 pA.

285 Finally, the prepared lamella (**Fig. 6f**) was examined using cryoET reconstruction. The  
286 microtubules in the basal body structure were clearly visible in the tomogram measured with a  
287 thickness of  $\sim 200$  nm (**Fig. 6g-h**). In conclusion, CSEI not only enables the precise localization  
288 of specific targets but also provides a serial view of the complete cells gradually. The latter is  
289 sometimes important for understanding the relationship between the lamella and the whole cell.

290

## 291 Discussion

292 In this work, we introduced CSEI to assist cryoFIB milling, which provided a complete solution  
293 for the on-the-fly location without the need for additional hardwares. We discussed the principles  
294 of secondary electron imaging on a milled flat surface of frozen hydrated cellular samples.  
295 Several key imaging parameters were tested to optimize imaging. Further in-depth studies are  
296 required to understand the imaging mechanism of the CSEI. Both our experiments and the  
297 reported work on cryoFIB-SEM block face imaging<sup>8-12</sup> have demonstrated the feasibility of CSEI.  
298 Furthermore, our comparisons also show that CSEI is generally applicable to all tested cryoFIB  
299 instruments. While the imaging quality varies among instruments, all tested instruments can meet  
300 the basic locating requirements. With further optimization of the CSEI, we believe that most of  
301 the tested cryoFIB instruments can achieve better imaging quality.

302 An important issue in the CSEI is the shadow, which is mostly caused by surface charging.  
303 These shadows are either dark (positive surface charge) or bright (negative surface charge), often  
304 severely reducing the available imaging area and obstructing the identification of fine structural  
305 details. Many factors can cause shadows, including but not limited to the electric conductivity of  
306 the bulky sample and the position of the detectors. We also observed that many samples were  
307 minimally affected by shadows. The reasons for the generation of shadows or surface charging  
308 are still not well understood, and further studies are required.

309 The cellular contents showed a remarkable contrast in the CSEI. Various membrane  
310 structures can be clearly distinguished, and the resolution of the CSEI is sufficient to distinguish

311 densely arranged multilayer membrane structures in the chloroplast stacked thylakoids. The  
312 CSEI can also distinguish protein aggregates and contrast variations caused by different protein  
313 concentrations. Moreover, the ion beam current, milling flatness, and possible surface damage of  
314 the FIB have very little effect on the CSEI, making it a reliable tool for on-the-fly imaging. The  
315 current CSEI imaging resolution should meet most of the needs of location requirements during  
316 cryoFIB milling.

317 Overall, CSEI allows us to achieve on-the-fly location during cryoFIB milling without any  
318 additional cost. Furthermore, the implementation of CSEI does not have any additional  
319 requirements for sample pre-processing and is free of fluorescent labeling. These features  
320 significantly enhance cryoFIB to achieve the target of milling arbitrary biological samples. Of  
321 course, this technology can also be combined with cryoCLEM technology to meet more diverse  
322 location needs.

323

#### 324 **Acknowledgements**

325 This work was supported by funds from Tsinghua-Peking Joint Center for Life Sciences, Beijing  
326 Frontier Research Center for Biological Structure, and Advanced Innovation Center for  
327 Structural Biology. We acknowledge Sihan Wang for providing the mouse liver tissue data,  
328 Yaxian Zhao for providing the NRK and HeLa cells, Zhengmao Wang for providing  
329 *Chlamydomonas* cells, and Ru Li for providing A431 cells. We acknowledge Xiaomin Li from  
330 Tsinghua University and Rui Ma from Thermo Fisher Scientific for technical support. We  
331 acknowledge ZEISS Microscopy Customer Center, Beijing lab for providing SEM-FIB facilities.  
332 We acknowledge Tsinghua University Branch of China National Center for Protein Sciences  
333 Beijing for providing facility supports in computing, cryoEM and SEM-FIB instruments.

334

#### 335 **Author contributions**

336 X.L. initialized the project. X.L. and C.L. designed the CSEI experiments. C.L. performed all  
337 experiments. L.Z. and Z.Z. assisted C.L. in CSEI experiments and prepared the sample. Y.J. and  
338 C.L. performed the experiments on Crossbeam 550. X.L. and C.L. wrote the manuscript. All  
339 authors revised the manuscript.

340

#### 341 **Competing interests**

342 The authors declare no competing interests.

343

344

345

346 **Figures and legends**

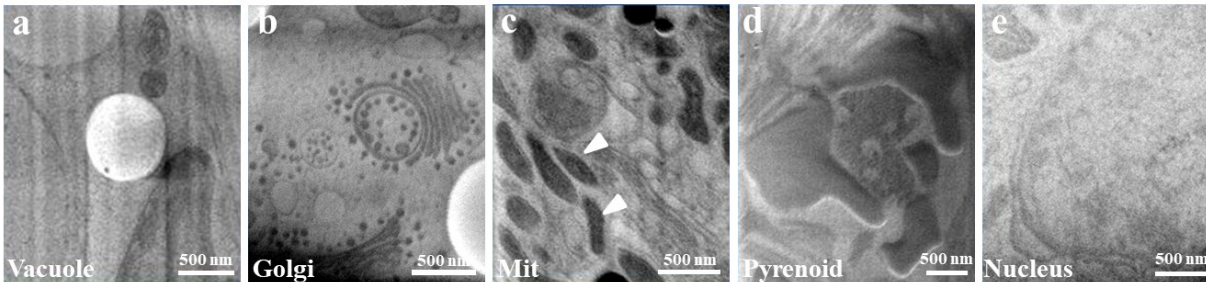

347

348 **Figure 1. CSEI of different cellular contents.** **a**, A vesicle in *C. reinhardtii* cell. **b**, Golgi  
349 apparatus in *C. reinhardtii* cell. **c**, Mitochondria in HeLa cell, pointed by white arrows. **d**, A  
350 pyrenoid in *C. reinhardtii* cell. **e**, Nucleus in HeLa cell. All images were collected using  
351 Crossbeam 550.

352

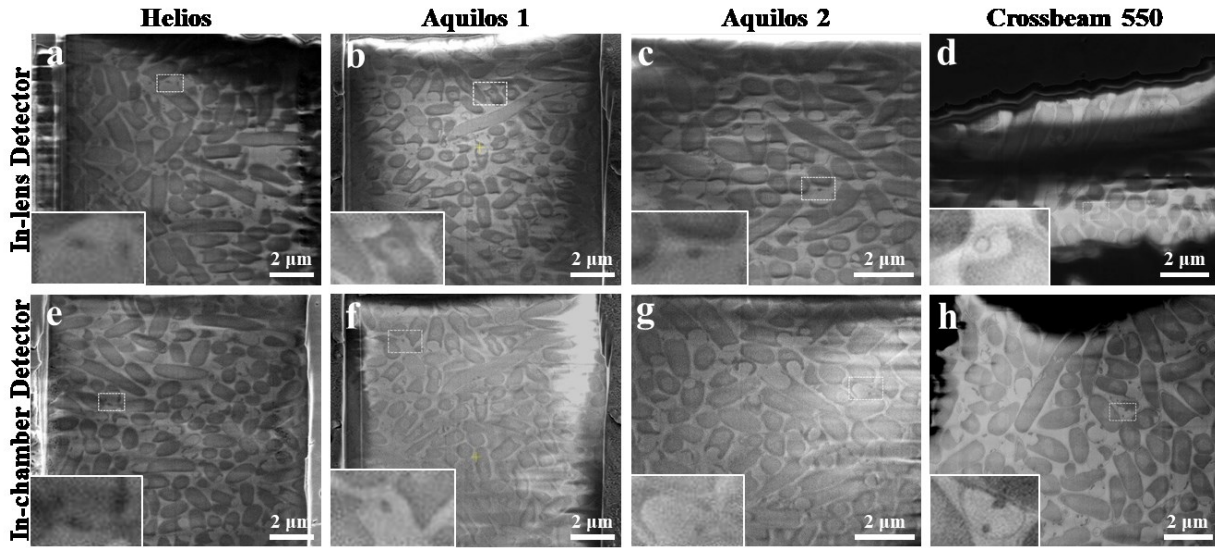

353

354 **Figure 2. *E. coli* cells visualized by different detectors of several cryoFIB instruments. a, b,**  
355 **c, and d, Typical frozen *E. coli* images collected by the in-lens detectors of four cryoFIB**  
356 **instruments. e, f, g, and h, Typical frozen *E. coli* images collected by the in-chamber detectors of**  
357 **four cryoFIB instruments. The name of the corresponding cryoFIB instrument for each column is**  
358 **labeled on the top. In each image, a small rectangle region is magnified and inset in the bottom**  
359 **left, which shows fine features of the membrane and cell boundary. All the images were acquired**  
360 **with the optimized image settings and demonstrated the best imaging quality that we could**  
361 **obtain on corresponding instruments.**

362



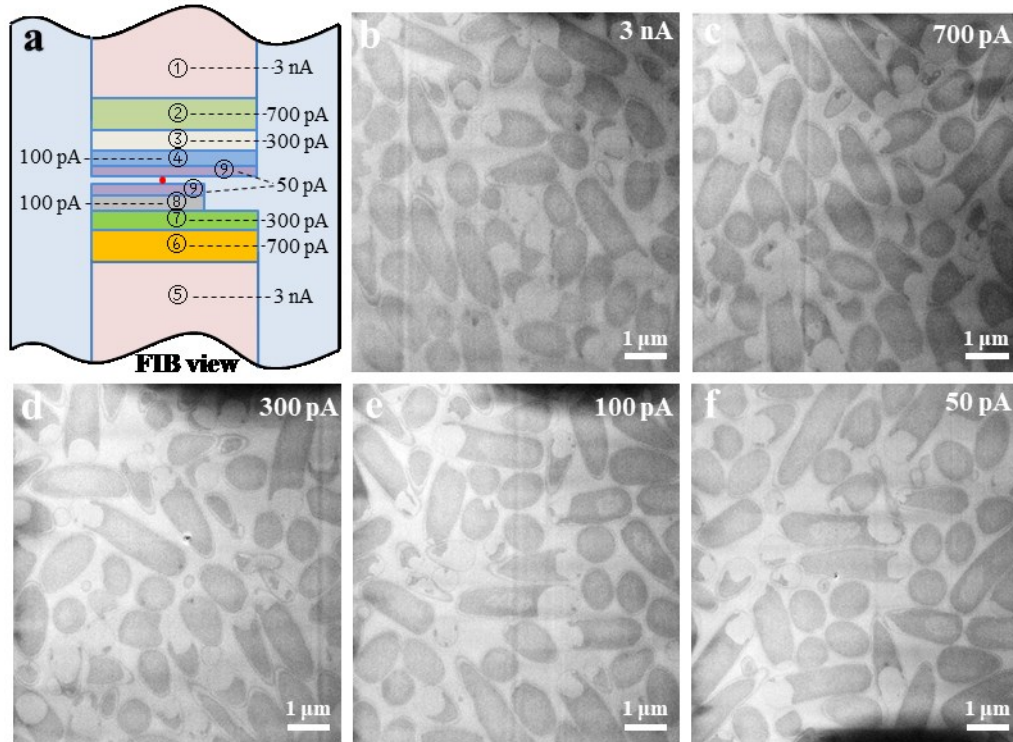

363

364 **Figure 3. The milling-locating workflow and CSEI on the surface milled by different ion**

365 **beam currents. a**, The milling patterns are shown under the FIB view, illustrating the milling-

366 locating workflow. The blue volume represents the remaining sample volume. Strips with other

367 colors indicate the volume removed by cryoFIB milling. The associated numbers of strips

368 indicate the milling sequence with the corresponding ion beam current. The red dot on the final

369 lamella presents the object of interest. **b, c, d, e, and f**, CSEI on the surfaces of frozen hydrated

370 *E. coli*, milled by different ion beam currents shown on the top right. All images were collected

371 using Crossbeam 550.

372



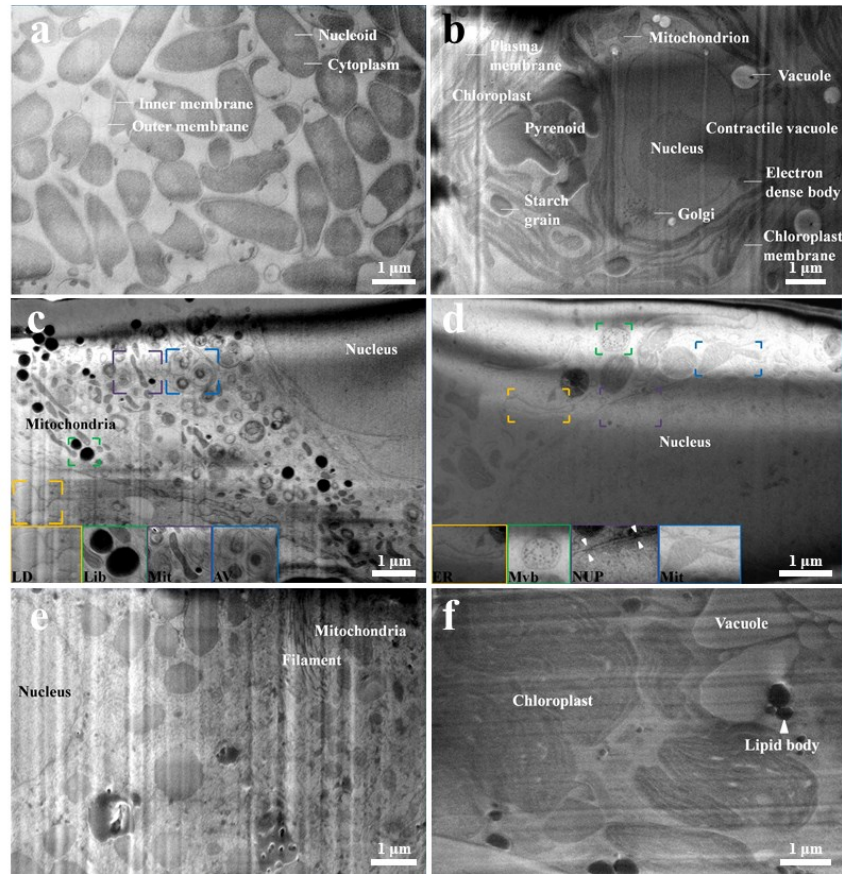

373

374 **Figure 4. Various cellular contents visualized by CSEI. a, *E. coli* cells. b, A *C. reinhardtii***

375 cell. c, A human skin squamous carcinoma cell. Insets show enlarged views of lipid droplets

376 (LD), lipid body (lib), mitochondria (Mit), and autophagic vesicles (AV).

377 d, A HeLa cell. Insets show enlarged views of endoplasmic reticulum (ER), multivesicular bodies (m vb), nucleopores

378 (NUP), and mitochondria (Mit).

379 e, A mouse liver cell. f, A plant cell in a *R. sativus*

380 tissue. Recognized organelles are labeled with their names in the images. All images were

381 collected using Crossbeam 550.

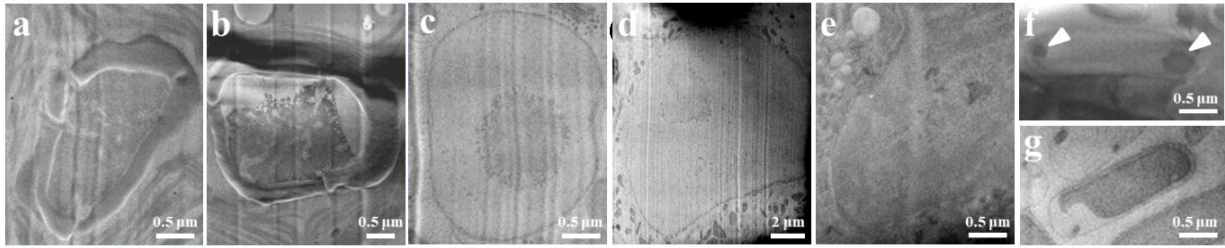

382  
383 **Figure 5. Membraneless organelles and protein aggregates visualized by CSEI. a, and b,**  
384 **Rubisco phase separation droplets at different developmental stages of *C. reinhardtii* cell. c, A**  
385 **nucleolus of *C. reinhardtii* cell. d, A nucleolus of a HeLa cell. e, Variable nuclear densities in a**  
386 **normal rat kidney (NRK) cell. f, A *E. coli* cell overexpressing T20S proteasome. Protein**  
387 **aggregations presented at the two ends of the bacterial cell are pointed by white arrows. g, A *E.***  
388 ***coli* without overexpressed T20S proteasome. All images were collected using Crossbeam 550.**

389

390

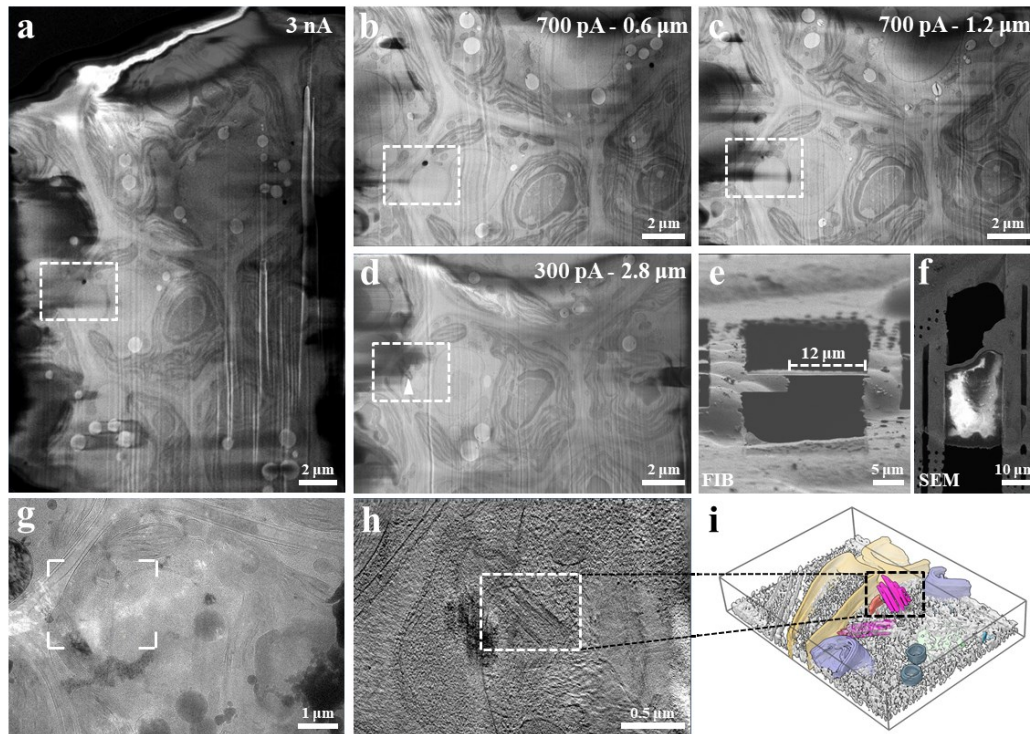

391  
392 **Figure 6. Milling and locating the basal body of *C. reinhardtii* with CSEI.** **a**, CSEI of a  
393 frozen hydrated *C. reinhardtii* samples after the first milling. A region labeled by a dashed box is  
394 recognized as the target basal body. **b**, CSEI of the selected region (dashed box) after milling at  
395 0.6  $\mu\text{m}$  depth using a 700 pA current. **c**, CSEI after milling the selected region (dashed box) for a  
396 further 0.6  $\mu\text{m}$  (total 1.2  $\mu\text{m}$ ) using a 700 pA current. **d**, CSEI after milling the selected region  
397 (dashed box) for a further 1.6  $\mu\text{m}$  (total 2.8  $\mu\text{m}$  relative to **a**) using a 300 pA current. The target  
398 basal body was pointed at by a white arrow. **e, and f**, The final lamella is shown in FIB and SEM  
399 views, respectively. The whole milling procedure is shown in **Supplementary Fig. 18**. **g**, A low-  
400 magnification image of the lamella observed under a 300 kV electron microscope. The target  
401 basal body is clearly visible. **h**, A section view of the tomogram with the target basal body. **i**, 3D  
402 rendered map of the tomogram shown in **h**. The basal body was pointed by a dashed box in **h** and  
403 **i** (purple). Segmented membranes are displayed in different colors. All images of CSEI were  
404 collected using Crossbeam 550.

405

406

## 407 References

- 408 1. Lucić, V. et al. Multiscale imaging of neurons grown in culture: from light microscopy to cryo-  
409 electron tomography. *J Struct Biol* **160**, 146-156 (2007).
- 410 2. van Driel, L.F., Valentijn, J.A., Valentijn, K.M., Koning, R.I. & Koster, A.J. Tools for correlative cryo-  
411 fluorescence microscopy and cryo-electron tomography applied to whole mitochondria in  
412 human endothelial cells. *Eur J Cell Biol* **88**, 669-684 (2009).
- 413 3. Chang, Y.W. et al. Correlated cryogenic photoactivated localization microscopy and cryo-  
414 electron tomography. *Nat Methods* **11**, 737-739 (2014).
- 415 4. Tuijtel, M.W., Koster, A.J., Jakobs, S., Faas, F.G.A. & Sharp, T.H. Correlative cryo super-resolution  
416 light and electron microscopy on mammalian cells using fluorescent proteins. *Sci Rep* **9**, 1369  
417 (2019).
- 418 5. Liu, B. et al. Three-dimensional super-resolution protein localization correlated with vitrified  
419 cellular context. *Sci Rep* **5**, 13017 (2015).
- 420 6. Dahlberg, P.D. et al. Cryogenic single-molecule fluorescence annotations for electron  
421 tomography reveal in situ organization of key proteins in *Caulobacter*. *Proc Natl Acad Sci U S A*  
422 **117**, 13937-13944 (2020).
- 423 7. Dahlberg, P.D. & Moerner, W.E. Cryogenic Super-Resolution Fluorescence and Electron  
424 Microscopy Correlated at the Nanoscale. *Annu Rev Phys Chem* **72**, 253-278 (2021).
- 425 8. Schertel, A. et al. Cryo FIB-SEM: volume imaging of cellular ultrastructure in native frozen  
426 specimens. *J Struct Biol* **184**, 355-360 (2013).
- 427 9. Sviben, S. et al. A vacuole-like compartment concentrates a disordered calcium phase in a key  
428 coccolithophorid alga. *Nat Commun* **7**, 11228 (2016).
- 429 10. Vidavsky, N. et al. Cryo-FIB-SEM serial milling and block face imaging: Large volume structural  
430 analysis of biological tissues preserved close to their native state. *J Struct Biol* **196**, 487-495  
431 (2016).
- 432 11. Spohner, D. et al. Cryo-FIB-SEM as a promising tool for localizing proteins in 3D. *J Struct Biol* **211**,  
433 107528 (2020).
- 434 12. Zhu, Y. et al. Serial cryoFIB/SEM Reveals Cytoarchitectural Disruptions in Leigh Syndrome Patient  
435 Cells. *Structure* **29**, 82-87.e83 (2021).
- 436 13. Stokes, D. Principles and practice of variable pressure/environmental scanning electron  
437 microscopy (VP-ESEM). (John Wiley & Sons, 2008).
- 438 14. Joy, D.C. & Joy, C.S. Study of the Dependence of E2 Energies on Sample Chemistry. *Microsc*  
439 *Microanal* **4**, 475-480 (1998).
- 440 15. Hayles, M.F., Stokes, D.J., Phifer, D. & Findlay, K.C. A technique for improved focused ion beam  
441 milling of cryo-prepared life science specimens. *J Microsc* **226**, 263-269 (2007).
- 442 16. Mackinder, L.C. et al. A repeat protein links Rubisco to form the eukaryotic carbon-  
443 concentrating organelle. *Proc Natl Acad Sci U S A* **113**, 5958-5963 (2016).
- 444 17. Freeman Rosenzweig, E.S. et al. The Eukaryotic CO<sub>2</sub>-Concentrating Organelle Is Liquid-like and  
445 Exhibits Dynamic Reorganization. *Cell* **171**, 148-162.e119 (2017).
- 446 18. Erdmann, P.S. et al. In situ cryo-electron tomography reveals gradient organization of ribosome  
447 biogenesis in intact nucleoli. *Nat Commun* **12**, 5364 (2021).
- 448 19. Wingfield, J.L. & Lehtreck, K.F. Chlamydomonas Basal Bodies as Flagella Organizing Centers.  
449 *Cells* **7** (2018).
- 450 20. Geimer, S. & Melkonian, M. Centrin scaffold in *Chlamydomonas reinhardtii* revealed by  
451 immunoelectron microscopy. *Eukaryot Cell* **4**, 1253-1263 (2005).





## 454 **Methods**

### 455 ***E. coli* cells and cryoEM sample preparation**

456 *E. coli* Rosetta (DE3) cells were grown in LB medium to an OD<sub>600</sub> of 0.6–0.8 at 37 °C. The cells  
457 were collected and resuspended in suspension buffer (50 mM Tris pH 8.0, 300 mM NaCl, and  
458 5% glycerol), and the concentration of the suspension was adjusted to an OD<sub>600</sub> of 25–40.  
459 Subsequently, a drop of 3 µl cell suspension was loaded on a glow-discharged (using a PELCO  
460 easiGlow Glow Discharger, Ted Pella Inc) grid (200 mesh gold 1.2/1.3, Quantifoil), and a drop  
461 of 2 µl suspension buffer was loaded on the reverse side of the grid. The grid was then blotted  
462 from the side with suspension buffer and plunge-frozen using a Leica EM GP (Leica  
463 Microsystems). The EM GP was set to a humidity of 75%, a temperature of 25 °C, and a blot  
464 time of 6–8 s.

465

### 466 **Mammalian cells and cryoEM sample preparation**

467 HeLa cells were cultured in DMEM (Thermo Fisher Scientific) with 5% CO<sub>2</sub> at 37 °C. After  
468 reaching 70–80% confluence, the cells were digested with 0.25% trypsin-EDTA (Fisher  
469 Scientific) for 2 min at 37 °C, washed with PBS, resuspended in DMEM, and diluted to 5 × 10<sup>5</sup>  
470 cells/ml. A431 cells were treated in a similar way, except that the A431 cells were resuspended in  
471 PBS rather than in DMEM. The cells were plunge-frozen in the same way as described for *E.*  
472 *coli* above.

473

### 474 ***C. reinhardtii* cells and cryoEM sample preparation**

475 *C. reinhardtii* 21gr cells were cultured as described in the literature<sup>1</sup>. Cells were grown to an  
476 OD<sub>600</sub> ~ 2 and harvested by centrifugation for 2 min at 2000 rpm to concentrate the cells 2–8  
477 times. The *C. reinhardtii* cells were plunge-frozen in the same way as described for *E. coli*  
478 above.

479

### 480 ***R. sativus* seedling leaf tissue and cryoEM sample preparation**

481 Green leaves of normal growing *R. sativus* seedlings were cut into small pieces and washed 2–3  
482 times in W5 buffer (154 mM NaCl, 25 mM CaCl<sub>2</sub>, 5 mM KCl, 2 mM MES pH 5.7, and 5 mM  
483 glucose), then placed in 4% liquid agarose at a temperature of approximately 40 °C. After the  
484 agar block solidified completely, the sample was fixed on the sample stage of a vibratome (Leica  
485 VT1200 S, Leica Microsystems). The sample tank was filled with W5 buffer before slicing. The  
486 sample was sliced with the settings of a slicing frequency of 85 Hz (±10%), an amplitude of 1  
487 mm, a slicing speed of 0.5 mm/s, and a slicing thickness of 50 µm. The prepared tissue slices  
488 were picked using tweezers, transferred to W5 buffer, and frozen on a glow-discharged grid  
489 (AG150P 200 mesh Cu, Zhongjingkeyi Technology) using a high-pressure freezer (Leica  
490 HPM100, Leica Microsystems). The grid was then transferred to Leica UC7+FC7 (Leica  
491 Microsystems) at -150 °C to separate the sapphire and the carrier by volatilizing the protective  
492 agent dimethyl pentane. After approximately 20 min, the grids were transferred to a liquid-  
493 nitrogen tank for storage.

494

### 495 **Pre-processing before cryoFIB milling**

496 A dual-beam FIB-SEM system (Helios NanoLab DualBeam G3 UC, Thermo Fisher) equipped  
497 with a cryo-stage (PP3010T, Quorum) was used to prepare the lamellae.

498 For the sample vitrified by the plunge-freezing method, the specimen was mounted into  
499 an AutoGrid (Thermo Fisher Scientific), loaded into a custom-made sample shuttle, and

500 transferred into the prep stage. A sputter coating (current 5 mA, 60 s) was applied in the prep  
501 chamber. The shuttle was then transferred to a cryo-stage. The sample was kept at -180 °C  
502 throughout the procedure. Before milling, organometallic platinum deposition was performed on  
503 the AutoGrid using the gas injection system (GIS) to reduce radiation damage and curtain effects.  
504 The cryo-stage was lowered 4 mm below the eucentric position. The GIS was then turned on for  
505 beam-induced Pt deposition of 30 s at 42 °C with an electron beam with an accelerating voltage  
506 of 2 kV and a current of 0.4 nA at 100x magnification.

507 For tissue samples vitrified by high-pressure freezing, the AutoGrid should stay for a longer  
508 time of 1–2 h at -150 °C in the prep stage to volatize the protective agent prior to sputter coating  
509 (5 mA, 60 s). The first beam-induced Pt deposition was performed following the same procedure  
510 as that used for the plunge-frozen specimen. The second Pt deposition was FIB-induced for 20 s  
511 at 42 °C, with an accelerating voltage of 30 kV and a current of 33 pA at 100x magnification and  
512 a working distance of 4 mm.

513

### 514 **FIB milling and SEM locating**

515 After pretreatment, AutoGrids were transferred to Crossbeam 550 (Carl Zeiss Microscopy  
516 GmbH), Helios Nanolab G3 UC (Thermo Fisher Scientific), Aquilos 1 Cryo-FIB (Thermo Fisher  
517 Scientific), and Aquilos 2 Cryo-FIB (Thermo Fisher Scientific) to separately execute FIB milling  
518 and CSEI. During the entire process, the temperature was maintained at -180 °C.

519 The entire procedure of FIB milling and SEM locating for *C. reinhardtii* cells was carried  
520 out using Crossbeam 550 (**Supplementary Fig. 18**). During cryoFIB milling, an appropriate  
521 milling angle was first selected according to the thickness of the sample, which was usually  
522 between 13° and 18°. Then, a larger Gallium ion beam current of 3 nA was chosen for the first  
523 rough milling with a milling window width of 20 µm under the FIB view. Subsequently, the ion  
524 beam current was reduced to 700 pA. Multiple milling steps with a milling depth of 600 nm were  
525 performed together with the CSEI. Once the target region was achieved, the sample was milled  
526 from the reverse side with a gradually reduced ion beam current, that is, using an ion beam  
527 current of 3 nA to 7 µm left, 700 pA to 4 µm left, 300 pA to 2 µm left, and 100 pA to 1 µm left.  
528 The milling window was then narrowed to a width of 12 µm using an ion beam current of 50 pA.  
529 In the final fine milling step, the two sides of the lamella were polished using an ion beam  
530 current of 50 pA.

531 CSEI in Crossbeam 550 used the settings of an accelerating voltage of 3 kV, an electron  
532 beam current of 50 pA, a dwell time of 1.8 µs (scan speed of 5), repetitive scans of 20 times. The  
533 final images were merged using images taken by the in-lens and in-chamber detectors with a  
534 mixing ratio of between 0.5 and 0.7.

535 In the test of CSEI by Crossbeam 550, the *E. coli* sample was first tilted to an appropriate  
536 angle between 13° and 18° relative to the incident direction of the ion beam. An ion beam current  
537 of 700 pA was used for the first rough milling from two sides of the lamella, with a width of 14  
538 µm and a spacing of 3 µm. Subsequently, an ion beam current of 300 pA was used to reduce the  
539 thickness to 2 µm. Then the width of the milling window was reduced to 12 µm. The lamella was  
540 polished by removing the ~100 nm thickness using an ion beam current of 50 pA ahead of each  
541 CSEI test. Before each CSEI test, the focus, astigmatism and other required SEM alignments  
542 were performed to ensure imaging quality. Different parameters were tested, including  
543 accelerating voltage of 1 kV/ 2 kV/ 3 kV/ 5 kV, electron beam current of 25 pA/ 50 pA/ 100 pA,  
544 dwell time of 0.5 µs (scan speed of 3)/ 0.9 µs (scan speed of 4)/ 1.8 µs (scan speed of 5)/ 3.5 µs  
545 (scan speed of 6), repetitive scans of 1 time/ 20 times/ 40 times, and working distance of 3.5 mm/

546 5 mm/ 7 mm. In-lens and in-chamber detectors were used in all the experiments.

547 In the test of CSEI by Helios and Aquilos (Aquilos 1 and Aquilos 2), the *E. coli* sample  
548 lamella was milled in the same way as described above. The direct alignments should also be  
549 adjusted to optimize the imaging conditions ahead of each CSEI test, including the lens  
550 alignment, source tilt, and stigmator centering. Focus centering should also be adjusted in  
551 Aquilos. Similar imaging conditions of the CSEI were tested as described above for Crossbeam  
552 550, including the accelerating voltage, electron beam current, dwell time, number of repetitive  
553 scans (image integration), and working distance. Furthermore, different modes and detectors of  
554 Helios and Aquilos were tested, including Mode 1/2 in Helios, Standard/ OptiTilt in Aquilos,  
555 ETD/ TLD/ ICE detectors of Helios, ETD/ T2 detectors of Aquilos. All images obtained by CSEI  
556 were adjusted for contrast and brightness using ImageJ<sup>2,3</sup>.

557

### 558 **CryoET data collection and reconstruction**

559 CryoET data were collected using a 300 kV Titan Krios electron microscope (Thermo Fisher  
560 Scientific) equipped with a GIF quantum energy filter (slit width of 20 eV). Micrographs were  
561 recorded with a K3 Summit direct electron detector (Gatan) working in super-resolution mode at  
562 a nominal magnification of 19,500, resulting in a calibrated pixel size of 2.261 Å. Tilt series were  
563 collected using the bidirectional tilt scheme, first from -13° to -49° and followed from -11° to 39°  
564 with an angular increment of 2°, at defocus ranging from -4 to -6 μm by SerialEM<sup>4</sup>. A  
565 micrograph with eight frames (0.213 s/frame) was recorded at each tilt angle, and the total dose  
566 for the tilt series was 90 e/Å<sup>2</sup>. Beam-induced motion was corrected using MotionCor2<sup>5</sup>. The tilt  
567 series were aligned and reconstructed using IMOD<sup>6</sup>. The final tomograms were processed using  
568 IsoNet<sup>7</sup>. The segmentation and surface rendering of the density map were performed by Amira  
569 (Thermo Fisher Scientific, Mercury Computer Systems), and the 3D rendered figures were  
570 prepared using ChimeraX<sup>8</sup>.

571

572

573

574



575 **Supplementary Figures and legends**

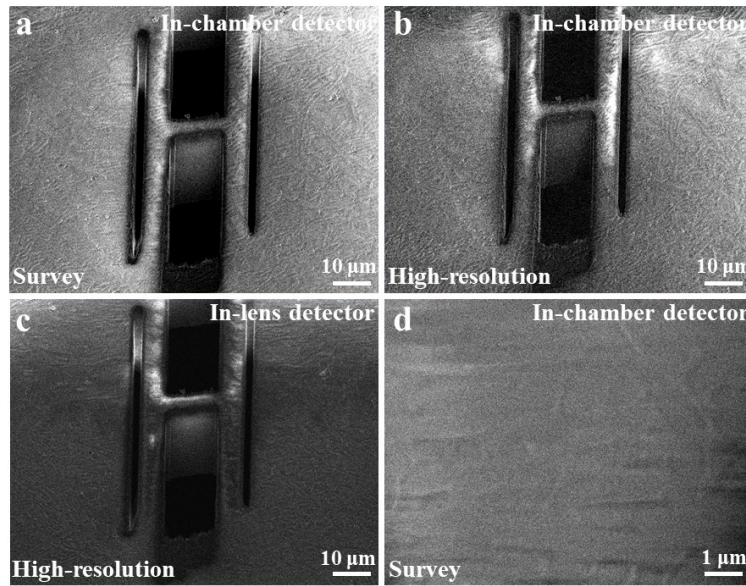

576  
577 **Supplementary Figure 1. Typical secondary electron images of cryoFIB milled sample**  
578 **under the default settings optimized for topographical imaging using Aquilos 2. a, A**  
579 **secondary electron image of a milled *E. coli* sample, imaged using an in-chamber detector with**  
580 **the default settings of the survey mode (Standard mode in Aquilos 2). b, A secondary electron**  
581 **image of the same sample as that in a, imaged using an in-chamber detector with the default**  
582 **settings of the high-resolution mode (OptiTilt mode in Aquilos2). c, A secondary electron**  
583 **image of the same sample as that in a, imaged using an in-lens detector (T2 in Aquilos 2) with the**  
584 **default settings of the high-resolution mode (OptiTilt in Aquilos 2). d, The secondary electron**  
585 **image of a cryoFIB milled surface of a frozen hydrated *E. coli* sample, imaged using the same**  
586 **imaging conditions as those in a. The image shows the nearly invisible contrast of the cells.**

587  
588

589

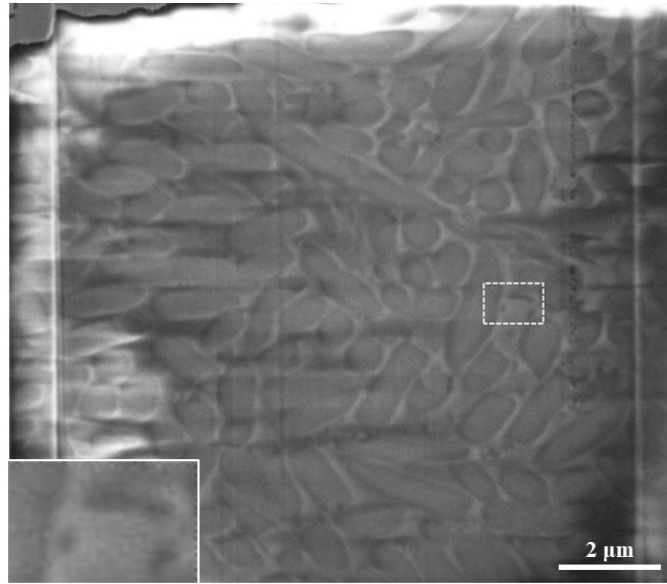

590

591

592

593

594

595

596

597

598

599

600

601

**Supplementary Figure 2. *E. coli* cells visualized using an in-chamber detector named ICE in Helios.** The ICE detector in Helios belongs to the in-chamber detector. The imaging quality of the ICE detector for CSEI was not as good as the other detectors in our test. Therefore, we did not include this detector in the comparison of Fig. 2 and just showed a typical image acquired by the ICE detector here. A small rectangle region is magnified and inset at the bottom left. The image was recorded at 2 kV in the survey mode (“mode 1” in Helios) using the same imaging parameters as those of **Fig. 2a** and **e**.

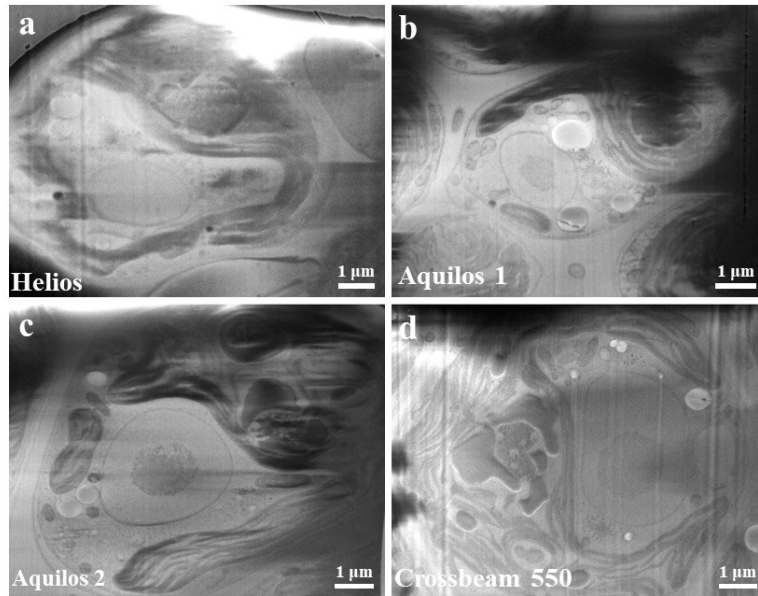

602  
603 **Supplementary Figure 3. *C. reinhardtii* cells visualized using different cryoFIB instruments.**  
604 **a**, An image acquired on Helios. **b**, An image acquired on Aquilos 1. **c**, An image acquired on  
605 Aquilos 2. The imaging for **a**, **b**, and **c** used the same settings with a voltage of 2 kV, electron  
606 beam current of 50 pA, a dwell time of 1 μs and repetitive scans of 20 times. **d**, An image  
607 acquired on Crossbeam 550 with a voltage of 3 kV, an electron beam current of 50 pA, a dwell  
608 time of 1.8 μs (scan speed of 5), and repetitive scans of 20 times. All the images were acquired  
609 on the cryoFIB milled surface of frozen hydrated *C. reinhardtii* cells. Crossbeam 550 is from a  
610 different vendor than the other three instruments, so some settings are slightly different to  
611 achieve the best image quality.

612  
613

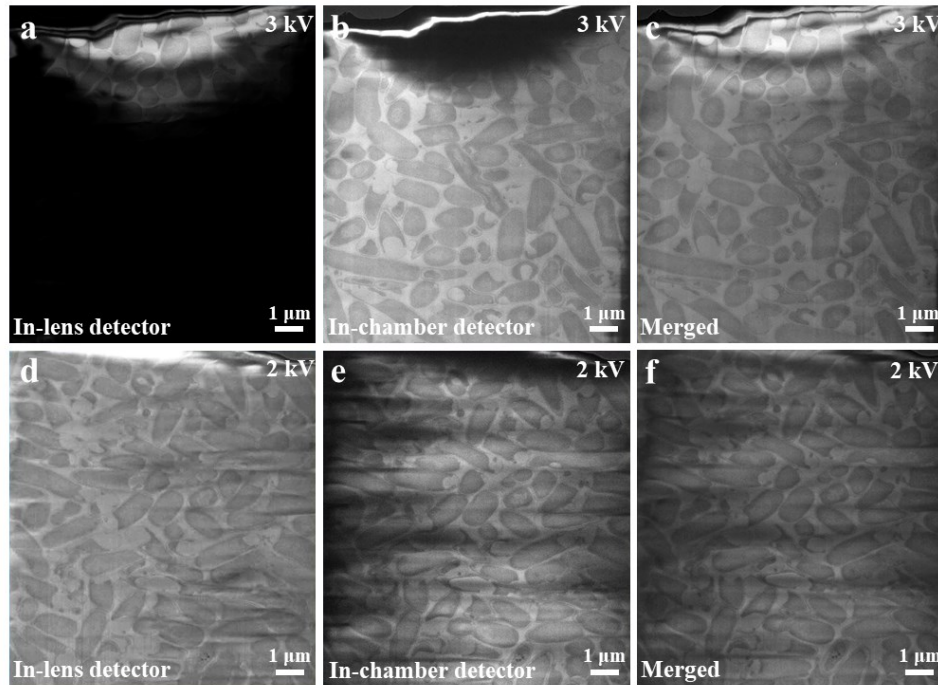

614

615 **Supplementary Figure 4. *E. coli* cells visualized by different detectors of Crossbeam 550. a,**  
616 **and b,** Images acquired by the in-lens and in-chamber detectors, respectively, at a voltage of 3  
617 kV. **c,** A merged image of **a** and **b**. The image **a** was significantly influenced by the shadow,  
618 which was frequently observed when using the in-lens detector on the Crossbeam 550. The  
619 merged image shows a complete view of the imaged area, demonstrating that the shadows  
620 appearing in **a** and **b** are complementary. **d,** and **e,** Images acquired by the in-lens and in-  
621 chamber detectors, respectively, at a voltage of 2 kV. **f,** A merged image of **d** and **e**. Under the  
622 lower voltage of 2 kV, the shadow issue that appeared on the in-lens detector disappeared. The  
623 reason is still not clear. All the images were acquired on the cryoFIB milled surface of frozen  
624 hydrated *E. coli* cells.

625

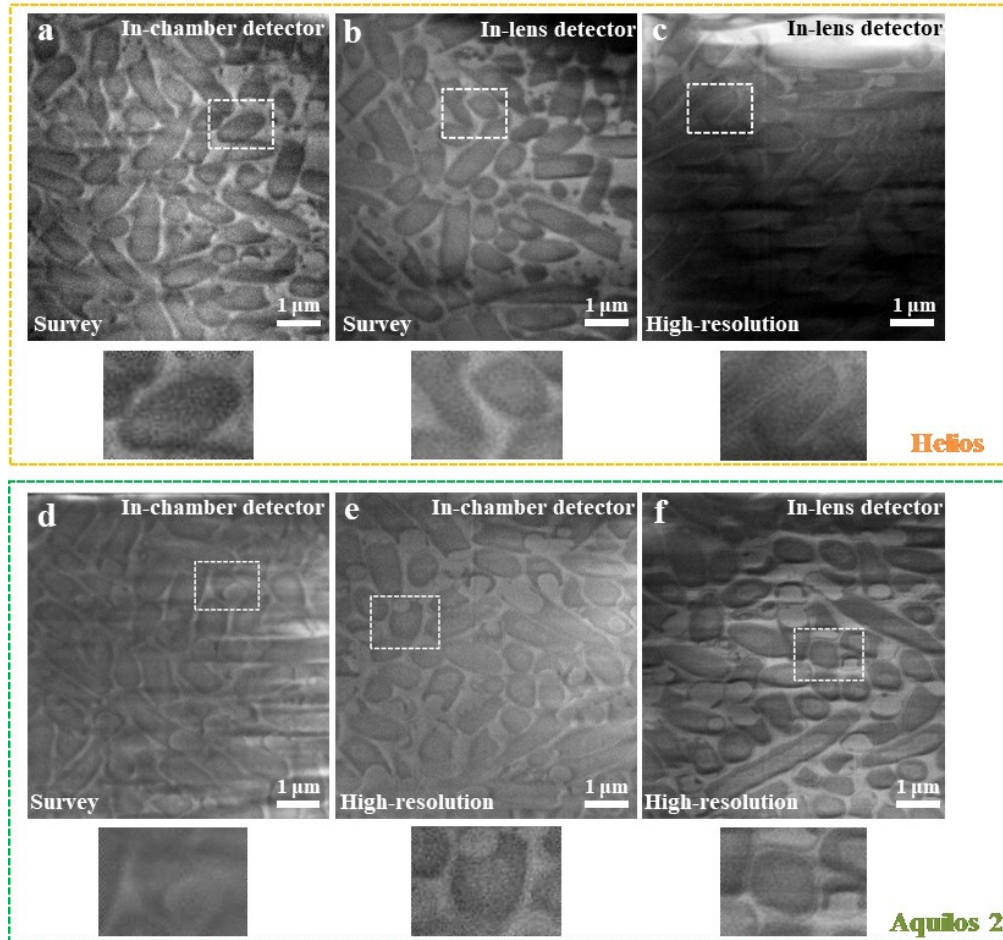

626  
627  
628  
629  
630  
631  
632  
633  
634

**Supplementary Figure 5. Comparison of the survey and high-resolution mode in Helios and Aquilos 2 for the purpose of CSEI.** **a-c**, Images acquired on Helios using different detectors and modes as labeled in the figure. **d-f**, Images acquired on Aquilos 2 using different detectors and modes as labeled in the figure. All images were recorded using a voltage of 2 kV, an electron beam current of 50 pA, a dwell time of 1  $\mu$ s, and repetitive scans of 20 times. A small rectangle region in each figure is magnified and shown below the corresponding image. All the images were acquired on the cryoFIB milled surface of frozen hydrated *E. coli* cells.



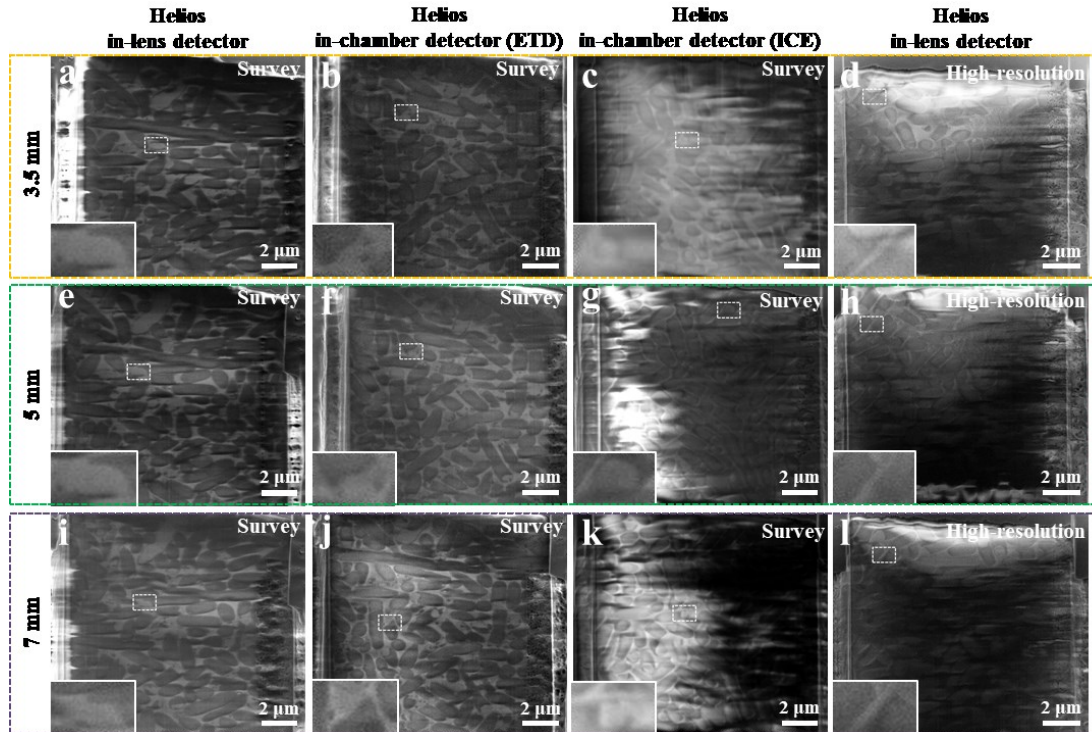

635  
636 **Supplementary Figure 6. Comparison of the influence of the working distance on CSEI for**  
637 **Helios. a-d,** Typical images acquired at a working distance of 3.5 mm using different detectors  
638 and imaging mode settings as labeled in each figure. **e-h,** Typical images acquired at a working  
639 distance of 5 mm using different detectors and imaging mode settings as labeled in each figure. **i-**  
640 **l,** Typical images acquired at a working distance of 7 mm using different detectors and imaging  
641 mode settings as labeled in each figure. All images were recorded using a voltage of 2 kV, an  
642 electron beam current of 50 pA, a dwell time of 1  $\mu$ s, and repetitive scans of 20 times. A small  
643 rectangle region in each figure is magnified and inset at the bottom left of the corresponding  
644 image. All the images were acquired on the cryoFIB milled surface of frozen hydrated *E. coli*  
645 cells.

646  
647  
648  
649

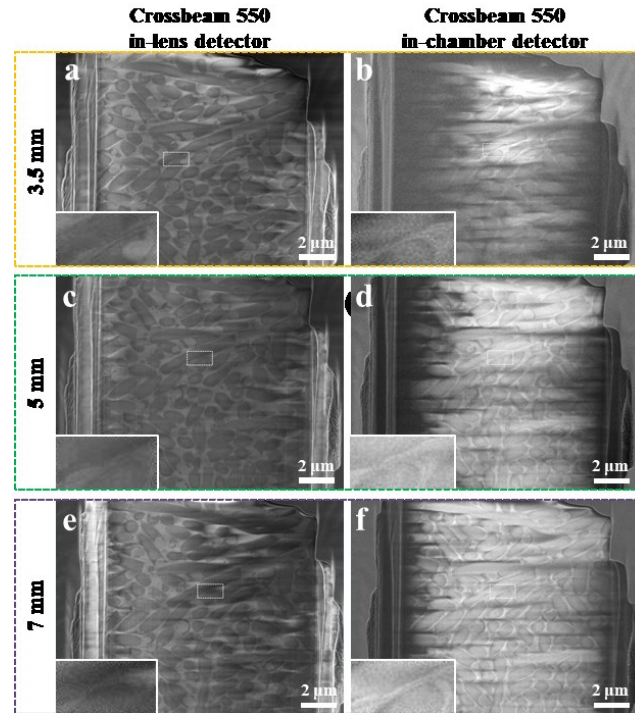

650  
651  
652  
653  
654  
655  
656  
657  
658  
659  
660  
661  
662  
663

**Supplementary Figure 7. Comparison of the influence of the working distance on CSEI for Crossbeam 550.** **a-b**, Typical images acquired at a working distance of 3.5 mm using different detectors and imaging mode settings as labeled in each figure. **c-d**, Typical images acquired at a working distance of 5 mm using different detectors and imaging mode settings as labeled in each figure. **e-f**, Typical images acquired at a working distance of 7 mm using different detectors and imaging mode settings as labeled in each figure. All images were recorded using a voltage of 2 kV, an electron beam current of 50 pA, a dwell time of 1.8  $\mu$ s (scan speed of 5), and repetitive scans of 20 times. A small rectangle region in each figure is magnified and inset at the bottom left of the corresponding image. All the images were acquired on the cryoFIB milled surface of frozen hydrated *E. coli* cells.

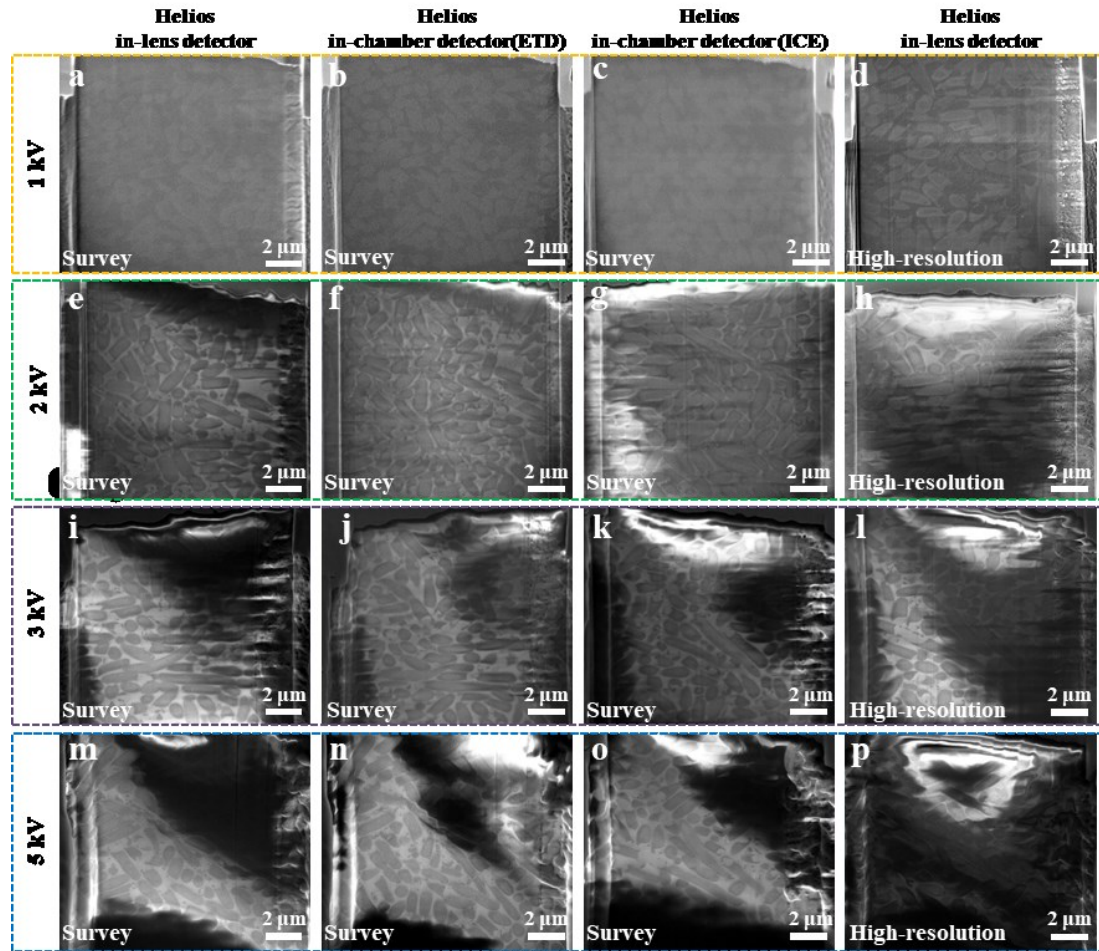

664  
665 **Supplementary Figure 8. Comparison of the influence of the voltage on CSEI for Helios. a-**  
666 **d,** Typical images acquired at a voltage of 1 kV using different detectors and imaging mode  
667 settings as labeled in each figure. **e-h,** Typical images acquired at a voltage of 2 kV using  
668 different detectors and imaging mode settings as labeled in each figure. **i-l,** Typical images  
669 acquired at a voltage of 3 kV using different detectors and imaging mode settings as labeled in  
670 each figure. **m-p,** Typical images acquired at a voltage of 5 kV using different detectors and  
671 imaging mode settings as labeled in each figure. All images were recorded using an electron  
672 beam current of 50 pA, a dwell time of 1  $\mu$ s, and repetitive scans of 20 times. All the images  
673 were acquired on the cryoFIB milled surface of frozen hydrated *E. coli* cells.  
674



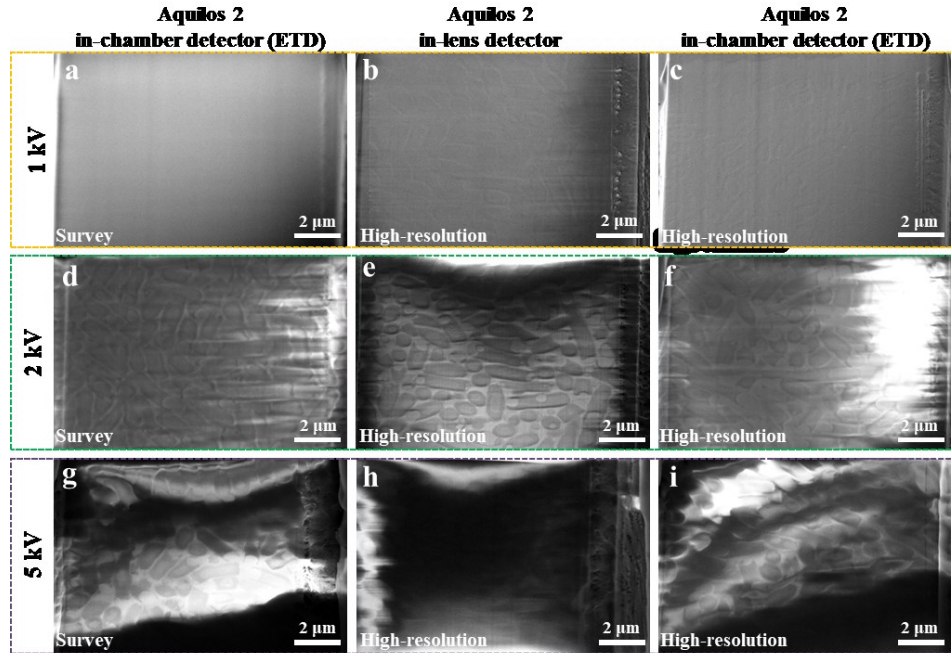

675  
676 **Supplementary Figure 9. Comparison of the influence of the voltage on CSEI for Aquilos 2.**  
677 **a-c**, Typical images acquired at a voltage of 1 kV using different detectors and imaging mode  
678 settings as labeled in each figure. **d-f**, Typical images acquired at a voltage of 2 kV using  
679 different detectors and imaging mode settings as labeled in each figure. **g-i**, Typical images  
680 acquired at a voltage of 5 kV using different detectors and imaging mode settings as labeled in  
681 each figure. All images were recorded using an electron beam current of 50 pA, a dwell time of 1  
682  $\mu$ s, and repetitive scans of 20 times. All the images were acquired on the cryoFIB milled surface  
683 of frozen hydrated *E. coli* cells.

684  
685  
686  
687  
688

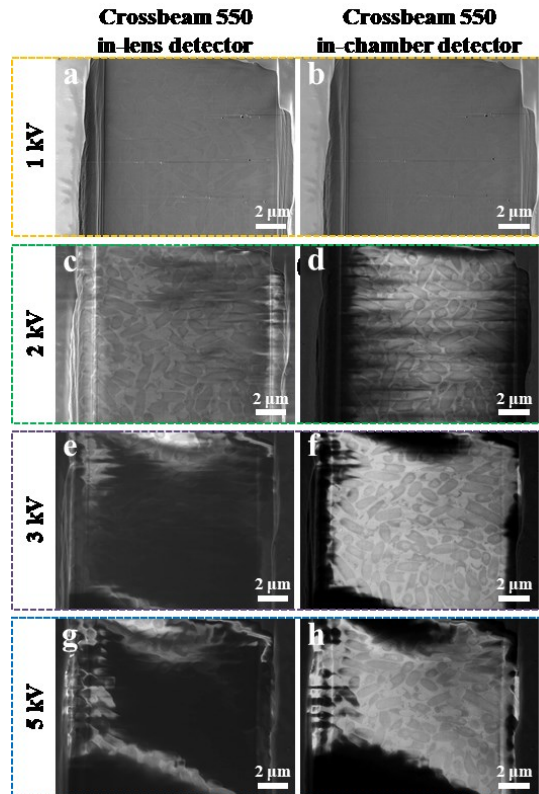

689  
690 **Supplementary Figure 10. Comparison of the influence of the voltage on CSEI for**  
691 **Crossbeam 550. a-b,** Typical images acquired at a voltage of 1 kV using different detectors as  
692 labeled on the top. **c-d,** Typical images acquired at a voltage of 2 kV using different detectors as  
693 labeled on the top. **e-f,** Typical images acquired at a voltage of 3 kV using different detectors as  
694 labeled on the top. **g-h,** Typical images acquired at a voltage of 5 kV using different detectors as  
695 labeled on the top. Crossbeam 550 only uses a single imaging mode and does not distinguish  
696 between the survey and high-resolution mode as other instruments tested in the present work. All  
697 images were recorded using an electron beam current of 50 pA, a dwell time of 1.8  $\mu$ s (scan  
698 speed of 5), and repetitive scans of 20 times. All the images were acquired on the cryoFIB milled  
699 surface of frozen hydrated *E. coli* cells.

700  
701

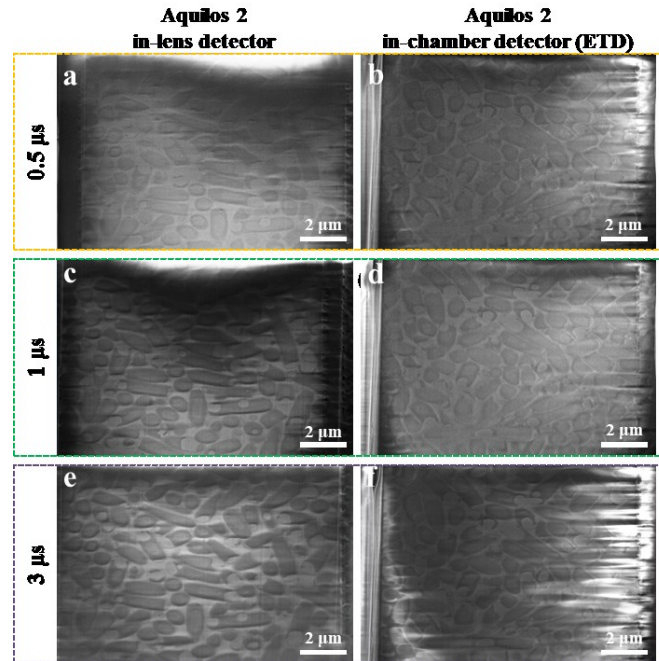

702  
703  
704  
705  
706  
707  
708  
709  
710  
711  
712  
713  
714  
715  
716  
717

**Supplementary Figure 11. Comparison of the influence of the dwell time on CSEI for Aquilos 2.** a-b, Typical images acquired at a dwell time of 0.5  $\mu\text{s}$  using different detectors as labeled on the top. c-d, Typical images acquired at a dwell time of 1  $\mu\text{s}$  using different detectors as labeled on the top. e-f, Typical images acquired at a dwell time of 3  $\mu\text{s}$  using different detectors as labeled on the top. All images were recorded using a voltage of 2 kV, an electron beam current of 50 pA, and repetitive scans of 20 times in the high-resolution mode (OptiTilt). All the images were acquired on the cryoFIB milled surface of frozen hydrated *E. coli* cells.

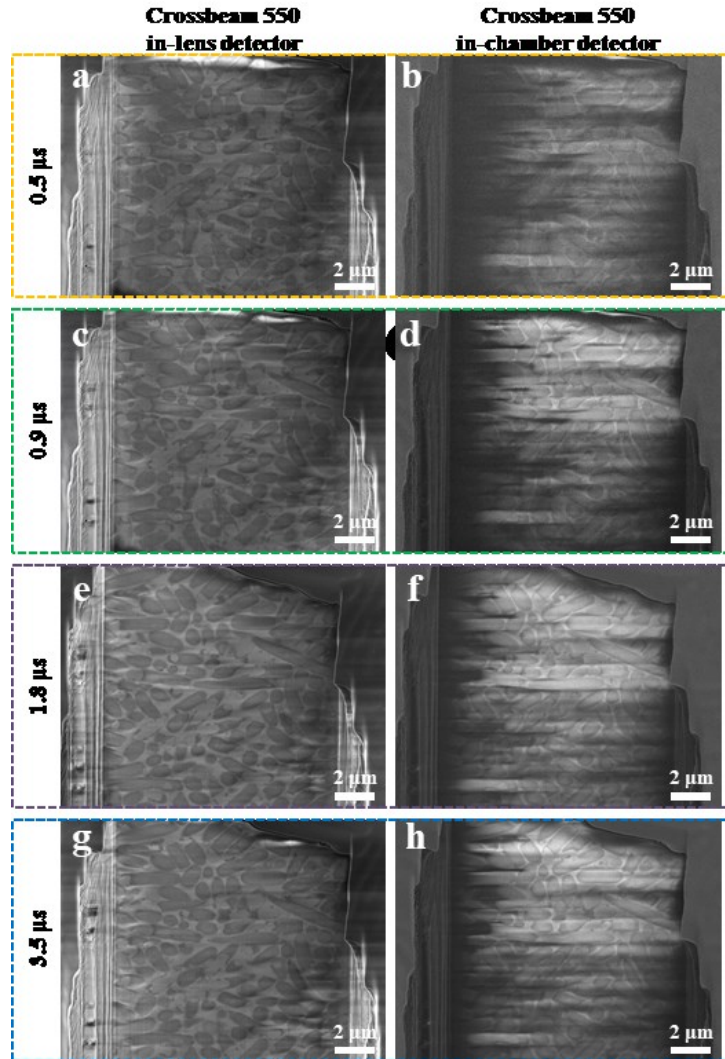

718  
719  
720  
721  
722  
723  
724  
725  
726  
727  
728  
729  
730  
731  
732  
733

**Supplementary Figure 12. Comparison of the influence of the dwell time on CSEI for Crossbeam 550.** a-b, Typical images acquired at a dwell time of 0.5 μs (scan speed of 3) using different detectors as labeled on the top. c-d, Typical images acquired at a dwell time of 0.9 μs (scan speed of 4) using different detectors as labeled on the top. e-f, Typical images acquired at a dwell time of 1.8 μs (scan speed of 5) using different detectors as labeled on the top. g-h, Typical images acquired at a dwell time of 3.5 μs (scan speed of 6) using different detectors as labeled on the top. All images were recorded using a voltage of 2 kV, an electron beam current of 50 pA, and repetitive scans of 20 times. All the images were acquired on the cryoFIB milled surface of frozen hydrated *E. coli* cells.

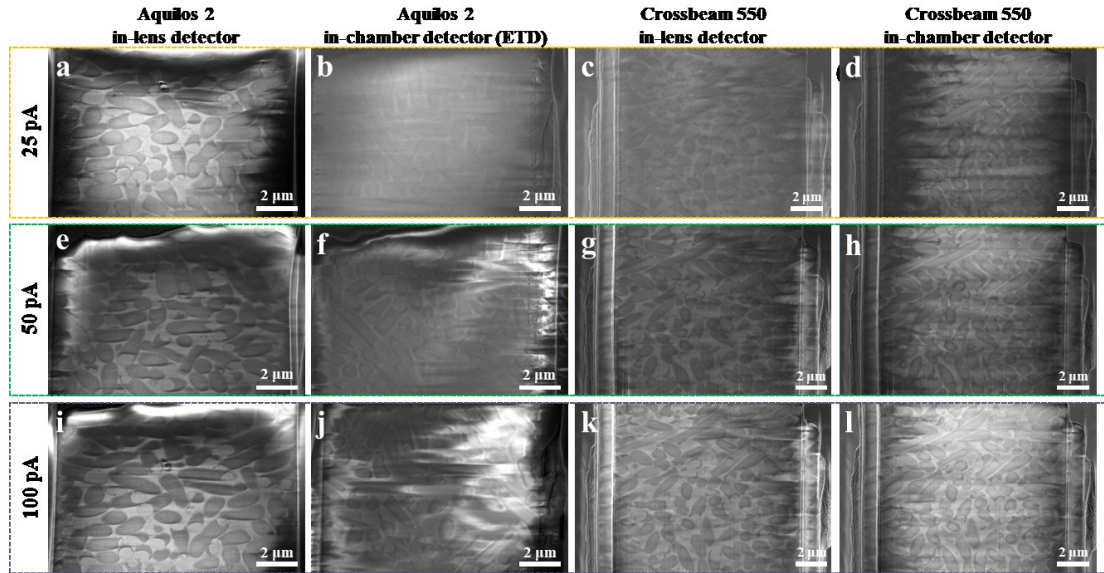

734  
735  
736  
737  
738  
739  
740  
741  
742  
743  
744  
745

**Supplementary Figure 13. Comparison of the influence of the electron beam current on CSEI.** **a-d**, Typical images acquired at an electron beam current of 25 pA using different detectors and instruments as labeled on the top. **e-h**, Typical images acquired at an electron beam current of 50 pA using different detectors and instruments as labeled on the top. **i-l**, Typical images acquired at an electron beam current of 100 pA using different detectors and instruments as labeled on the top. Images were recorded on Aquilos 2 using a voltage of 2 kV, a dwell time of 1  $\mu$ s, and repetitive scans of 20 times in the high-resolution mode (OptiTilt). Images were recorded on Crossbeam 550 using a voltage of 2 kV, a dwell time of 1.8  $\mu$ s (scan speed of 5), and repetitive scans of 20 times. All the images were acquired on the cryoFIB milled surface of frozen hydrated *E. coli* cells.



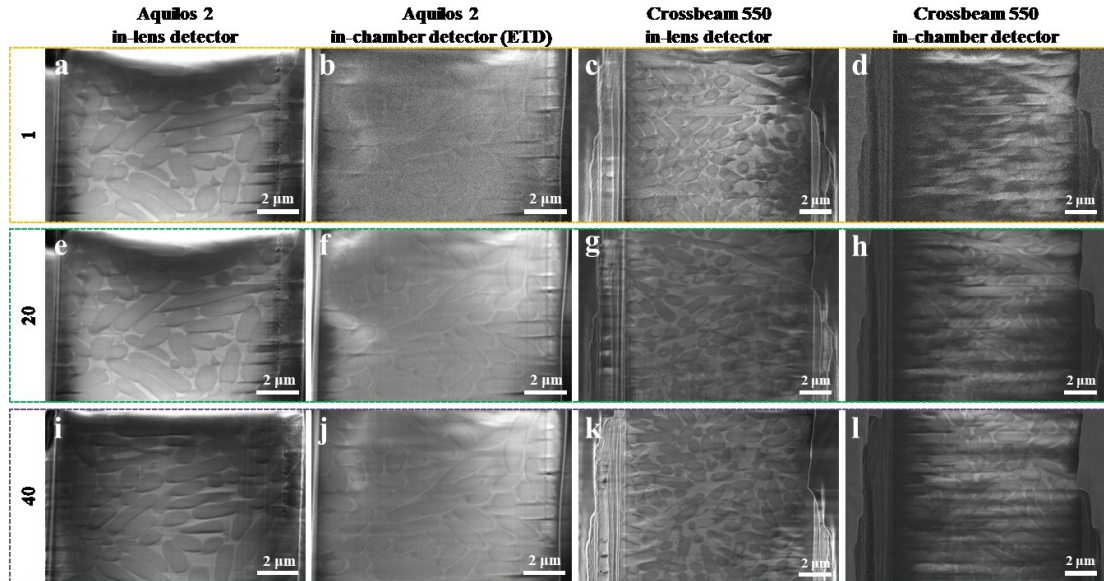

746

747

748 **Supplementary Figure 14. Comparison of the influence of the number of repetitive scans on**

749 **CSEI. a-d,** Typical images acquired with repetitive scans of 1 time using different detectors and

750 instruments as labeled on the top. **e-h,** Typical images acquired with repetitive scans of 20 times

751 using different detectors and instruments as labeled on the top. **i-l,** Typical images acquired with

752 repetitive scans of 40 times using different detectors and instruments as labeled on the top.

753 Images were recorded on Aquilos 2 using a voltage of 2 kV, a dwell time of 1  $\mu$ s, and an electron

754 beam current of 50 pA in the high-resolution mode (OptiTilt). Images were recorded on

755 Crossbeam 550 using a voltage of 2 kV, a dwell time of 1.8  $\mu$ s (scan speed of 5), and an electron

756 beam current of 50 pA. All the images were acquired on the cryoFIB milled surface of frozen

757 hydrated *E. coli* cells.

758

759

760

761

762

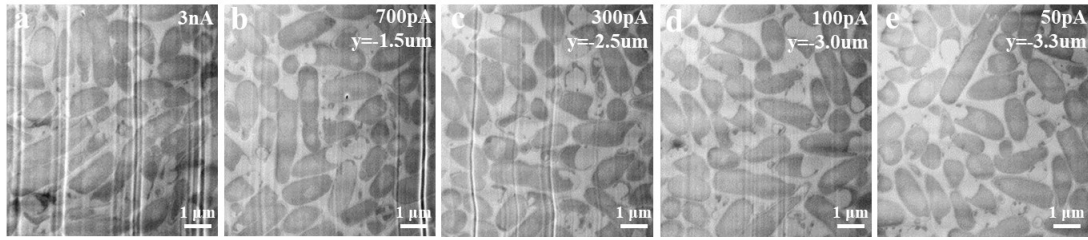

763

764

765 **Supplementary Figure 15. CSEI on the surface milling by different ion beam currents with**

766 **severe curtaining issue.** Sample surfaces of frozen hydrated *E. coli*, milled by different ion

767 beam currents as shown on the top right and visualized by CSEI. Images were recorded on

768 Crossbeam 550 using a voltage of 3 kV, a dwell time of 1.8  $\mu$ s (scan speed of 5), an electron

769 beam current of 50 pA, and repetitive scans of 20 times.

770

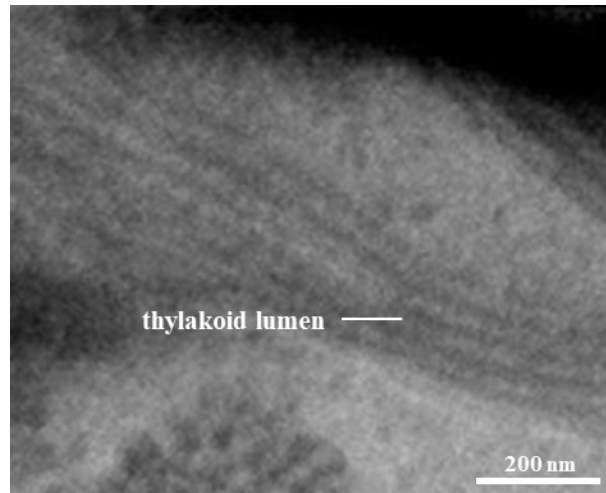

771

772

773 **Supplementary Figure 16. CSEI visualization of stacked membranes in the thylakoid**

774 **lumen.** The densely stacked thylakoids of grana in chloroplasts can be distinguished clearly. The

775 *C. reinhardtii* cell was cryoFIB milled and observed using Crossbeam 550. The image was

776 recorded using a voltage of 3 kV, a dwell time of 1.8  $\mu$ s (scan speed of 5), an electron beam

777 current of 50 pA, and repetitive scans of 20 times.

778

779



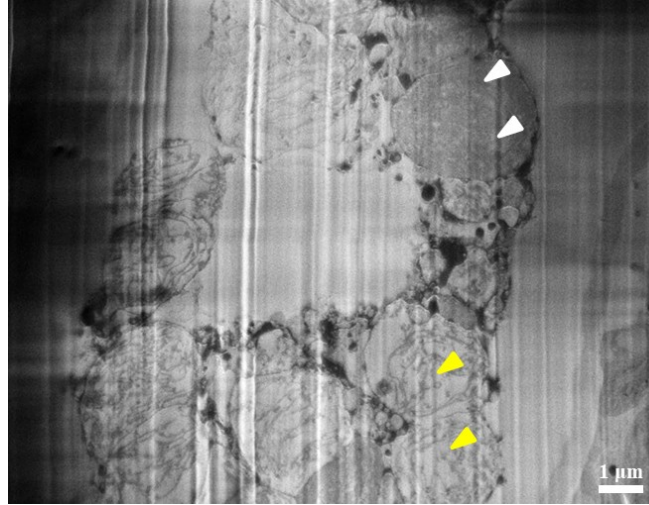

780  
781 **Supplementary Figure 17. A *R. sativus* tissue sample visualized by CSEI.** White arrows point  
782 to intact *R. sativus* cells containing chloroplast matrix proteins. Yellow arrows point to *R. sativus*  
783 cells that may lose chloroplast matrix proteins, which are lighter in gray level. The loss of  
784 chloroplast matrix proteins might be due to the mechanical damage during the sample  
785 preparation by a vibratory microtome.

786  
787  
788  
789

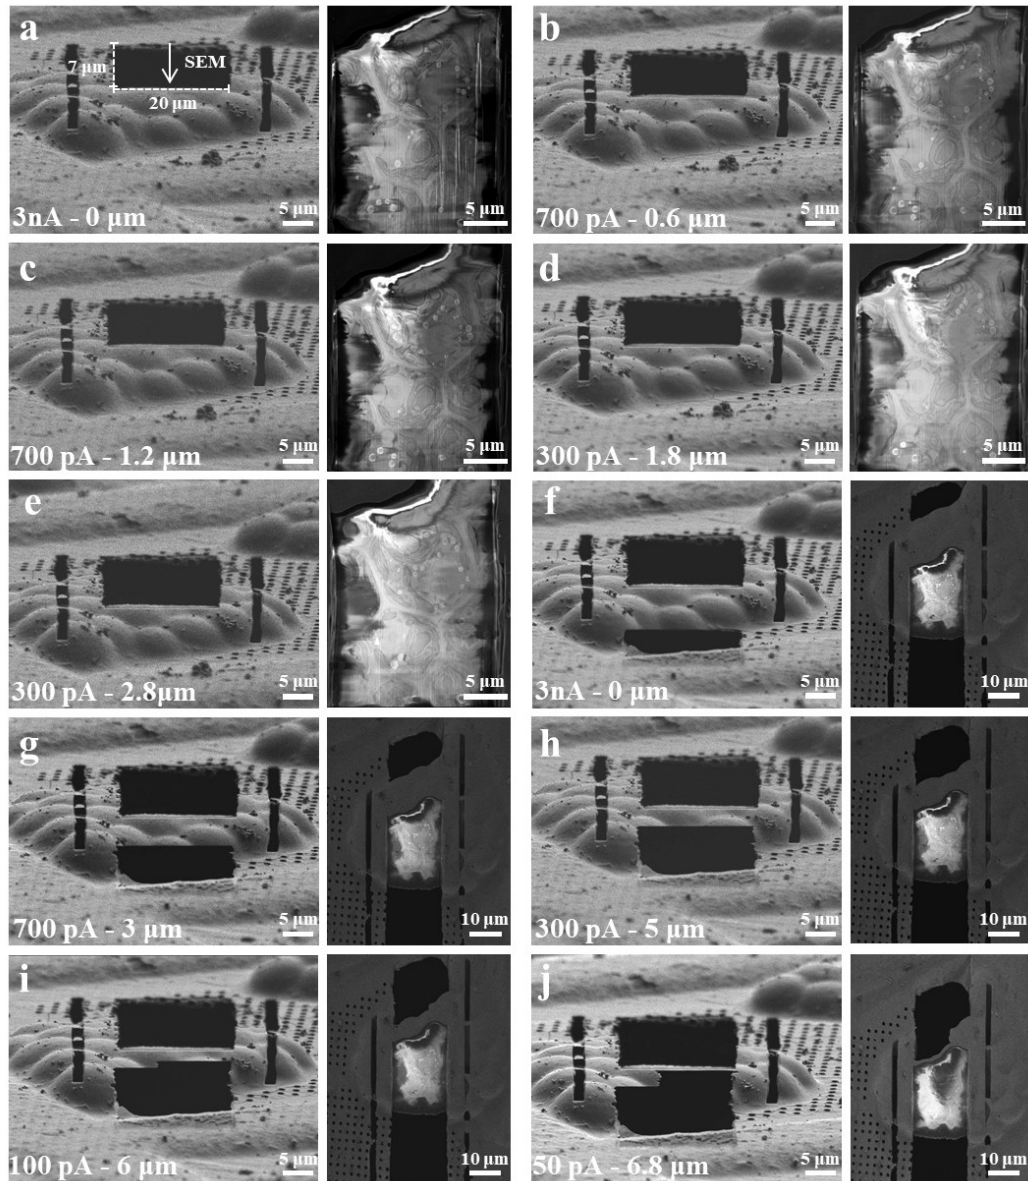

790

791

792 **Supplementary Figure 18. Illustration of a complete milling workflow with on-the-fly**

793 **locating of the basal body in lamella.** The frozen hydrated *C. reinhardtii* cells were used for the

794 test. In each panel, a pair of images under FIB (left) and SEM (right) view is shown. The ion

795 beam current and accumulated milling depth is shown on the bottom of each FIB image. **a**, Initial

796 milling in a window of 20  $\mu\text{m}$  width and 7  $\mu\text{m}$  height under FIB view, and CSEI was performed

797 on the milled surface (white arrow). **b**, **c**, **d**, and **e**, Multiple milling on one side of the sample to

798 locate the target basal body. **f**, The first coarse milling on another side relative to **a**. **g** and **h**,

799 Multiple milling to further reduce the thickness. **i** and **j**, Multiple milling with reduced width to

800 focus on the region with the target basal body. Images were recorded on Crossbeam 550, and

801 CSEI was performed with a voltage of 3 kV, a dwell time of 1.8  $\mu\text{s}$  (scan speed of 5), an electron

802 beam current of 50 pA, and repetitive scans of 20 times.

802

803 **Supplementary Tables and Legends**

804

805 **Supplementary Table 1.** Trade names of detectors on different cryoFIB instruments.

|                           | Helios           | Aquilos 1        | Aquilos 2        | Crossbeam 550    |
|---------------------------|------------------|------------------|------------------|------------------|
| In-lens detector          | TLD <sup>a</sup> | T2               | T2               | Inlens           |
| In-chamber detector (ETD) | ETD <sup>b</sup> | ETD <sup>b</sup> | ETD <sup>b</sup> | SE2 <sup>c</sup> |
| In-chamber detector (ICE) | ICE <sup>d</sup> |                  |                  |                  |

806 <sup>a</sup>The Through Lens Detector (TLD).

807 <sup>b</sup>The Everhart Thornley Detector (ETD) is permanently mounted in the chamber over and to one side of the sample.

808 <sup>c</sup>The SE2 detector is an Everhart Thornley type detector.

809 <sup>d</sup>The In Chamber Electronics (ICE) detector is mounted near the end of the ion column. Only Helios has the ICE  
810 detector.

811

812 **Supplementary Table 2.** Trade names of modes on different cryoFIB instruments. Crossbeam  
813 550 does not differentiate between the survey mode and the high-resolution mode.

|                      | Helios              | Aquilos 1 | Aquilos 2 |
|----------------------|---------------------|-----------|-----------|
| Survey mode          | Mode 1 <sup>a</sup> | Standard  | Standard  |
| High-resolution mode | Mode 2 <sup>b</sup> | OptiTilt  | OptiTilt  |

814 <sup>a</sup>Mode 1 is the default survey mode in Helios and is essential for navigation and assessment of the sample during the  
815 FIB milling process. In Mode 1, the immersion lens is switched off.

816 <sup>b</sup>In Mode 2, the immersion lens is switched on.

817

818

819 **References**

- 820 1. Zhu, X., Wang, J., Li, S., Lechtreck, K. & Pan, J. IFT54 directly interacts with kinesin-II and IFT dynein to  
821 regulate anterograde intraflagellar transport. *Embo j* **40**, e105781 (2021).
- 822 2. Girish, V. & Vijayalakshmi, A. Affordable image analysis using NIH Image/ImageJ. *Indian J Cancer* **41**, 47  
823 (2004).
- 824 3. Collins, T.J. ImageJ for microscopy. *Biotechniques* **43**, S25-S30 (2007).
- 825 4. Mastronarde, D.N. Automated electron microscope tomography using robust prediction of specimen  
826 movements. *J Struct Biol* **152**, 36-51 (2005).
- 827 5. Zheng, S.Q. et al. MotionCor2: anisotropic correction of beam-induced motion for improved cryo-electron  
828 microscopy. *Nat Methods* **14**, 331-332 (2017).
- 829 6. Kremer, J.R., Mastronarde, D.N. & McIntosh, J.R. Computer visualization of three-dimensional image data  
830 using IMOD. *J Struct Biol* **116**, 71-76 (1996).
- 831 7. Liu, Y.-T. et al. Isotropic Reconstruction of Electron Tomograms with Deep Learning. *bioRxiv*,  
832 2021.2007.2017.452128 (2021).
- 833 8. Goddard, T.D. et al. UCSF ChimeraX: Meeting modern challenges in visualization and analysis. *Protein Sci*  
834 **27**, 14-25 (2018).
- 835
- 836
